# Supplementary material for: Studies on [3]pseudorotaxane formation from a bis-azacrown derivative as host and imidazolium ion-derivatives as guest
Source: Royal Society of Chemistry journal article supplement (doi:10.1039/c0ob01106a), 2011-01-01
Supplement: c0ob01106a.pdf [file c0ob01106a.pdf]

## Electronic Supporting Information

### **Studies on [3]pseudorotaxane Formation from a Bis-azacrown Derivative as Host and Imidazolium Ion-derivatives as Guest**

Amal Kumar Mandal, Moorthy Suresh, Amitava Das.\*

*Central Salt & Marine Chemicals Research Institute (CSIR),  
Bhavnagar: 364002, Gujarat, India,  
E-Mail: [amitava@csmcri.org](mailto:amitava@csmcri.org)*

|    |                                                                                     |    |
|----|-------------------------------------------------------------------------------------|----|
| 1  | Synthetic route for <b>H</b>                                                        | 3  |
| 2  | Synthetic route for <b>G<sub>1</sub></b> and <b>G<sub>2</sub></b>                   | 4  |
| 3  | Synthesis of compound <b>I</b>                                                      | 5  |
| 4  | Mass spectrum for <b>H.2G<sub>1</sub></b>                                           | 6  |
| 5  | Mass spectrum for <b>H.2G<sub>2</sub></b>                                           | 7  |
| 6  | <sup>1</sup> H-NMR spectrum of compound <b>A</b>                                    | 8  |
| 7  | Mass spectrum of compound <b>A</b>                                                  | 9  |
| 8  | <sup>1</sup> H-NMR spectrum of compound <b>1</b>                                    | 10 |
| 9  | <sup>13</sup> C-NMR spectrum of compound <b>1</b>                                   | 11 |
| 10 | Mass spectrum of compound <b>1</b>                                                  | 12 |
| 11 | <sup>1</sup> H NMR spectrum of compound <b>2</b>                                    | 13 |
| 12 | <sup>13</sup> C NMR spectrum of compound <b>2</b>                                   | 14 |
| 13 | Mass spectrum of compound <b>2</b>                                                  | 15 |
| 14 | <sup>1</sup> H-NMR spectrum of compound <b>3</b>                                    | 16 |
| 15 | <sup>13</sup> C NMR spectrum of compound <b>3</b>                                   | 17 |
| 16 | Mass spectrum of compound <b>3</b>                                                  | 18 |
| 17 | <sup>1</sup> H NMR spectrum of compound <b>H</b>                                    | 19 |
| 18 | <sup>13</sup> C NMR spectrum of compound <b>H</b>                                   | 20 |
| 19 | Mass spectrum of compound <b>H</b>                                                  | 21 |
| 20 | HRMS spectrum of <b>H</b>                                                           | 22 |
| 21 | <sup>1</sup> H NMR spectrum of compound <b>I</b>                                    | 23 |
| 22 | Mass spectrum of compound <b>I</b>                                                  | 24 |
| 23 | <sup>1</sup> H NMR spectrum of compound <b>G<sub>2</sub></b>                        | 25 |
| 24 | <sup>13</sup> C NMR spectrum of compound <b>G<sub>2</sub></b>                       | 26 |
| 25 | Mass spectrum of compound <b>G<sub>2</sub></b>                                      | 27 |
| 26 | <sup>1</sup> H NMR spectrum of compound <b>G<sub>1</sub></b>                        | 28 |
| 27 | <sup>13</sup> C NMR spectrum of compound <b>G<sub>1</sub></b>                       | 29 |
| 28 | Mass spectrum of compound <b>G<sub>1</sub></b>                                      | 30 |
| 29 | <sup>1</sup> H-NMR spectrum of <b>H.2 G<sub>1</sub></b> and <b>H.2G<sub>1</sub></b> | 31 |
| 30 | <sup>1</sup> H-NMR spectrum of <b>H,G<sub>2</sub></b> and <b>H.2G<sub>2</sub></b>   | 32 |
| 31 | Stern-Volmer plot of <b>H.2G<sub>1</sub></b> & <b>H.2G<sub>2</sub></b> .            | 33 |
| 32 | <sup>1</sup> H NMR spectra of <b>H.2G<sub>2</sub></b> in methanol                   | 34 |
| 33 | 2D-COSY spectrum of <b>H.2G<sub>2</sub></b>                                         | 35 |
| 34 | 2D-NOESY spectrum of <b>H.2G<sub>2</sub></b>                                        | 36 |
| 35 | 2D-NOESY spectrum of <b>H.2G<sub>1</sub></b>                                        | 37 |

## 1. Synthetic route for H:

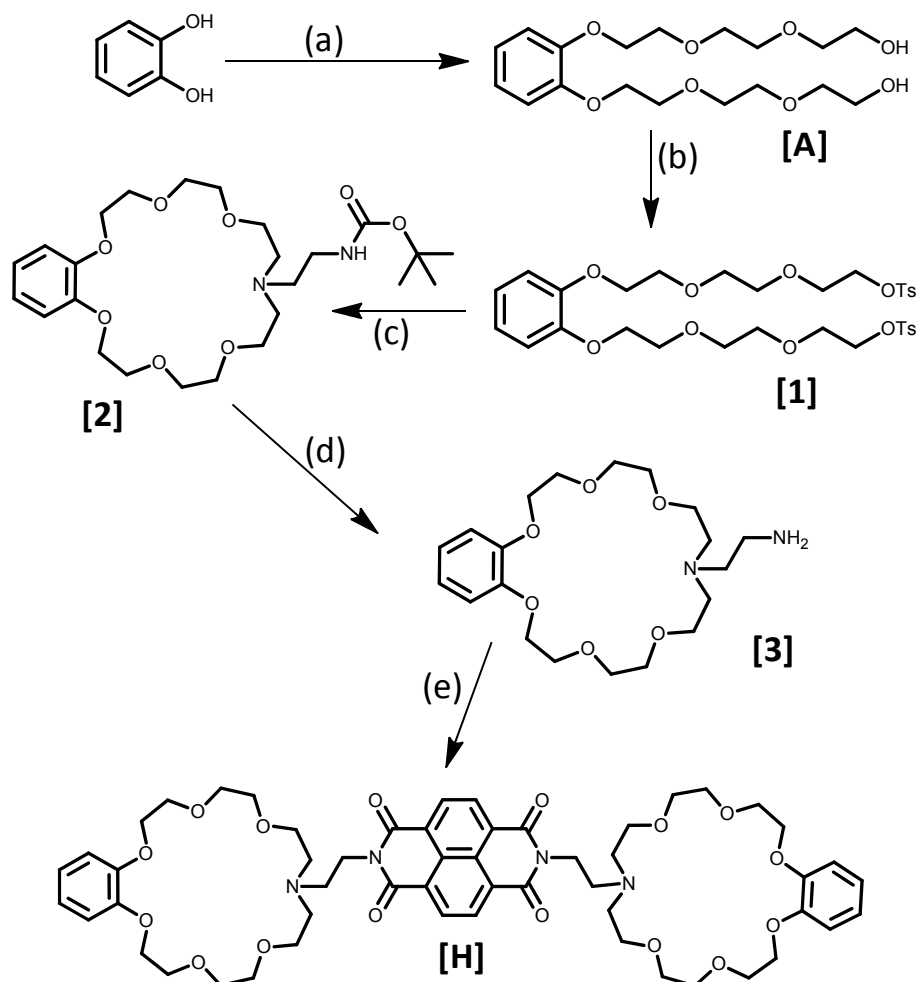

Reagents and conditions: (a)  $\text{Cl}(\text{CH}_2\text{O})_3\text{H}$ ,  $\text{K}_2\text{CO}_3$ ,  $\text{KI}$ ,  $\text{DMF}$ ,  $90^\circ\text{C}$  (b)  $\text{TsCl}$ ,  $\text{NaOH}$ ,  $\text{THF}/\text{H}_2\text{O}$ ,  $0^\circ\text{C}$  -  $\text{RT}$ . (c)  $\text{K}_2\text{CO}_3$ ,  $\text{KI}$ ,  $\text{H}_2\text{N}(\text{CH}_2)_2\text{NHBoc}$ ,  $\text{MeCN}$ ,  $81^\circ\text{C}$ . (d)  $\text{HCl}$ ,  $\text{Et}_2\text{O}$ ,  $\text{DCM}$ ,  $\text{RT}$ . (e) 1,4,5,8-Naphthalene dianhydride,  $\text{MeCN}$ ,  $81^\circ\text{C}$ .

## 2. Synthetic route for G1 & G2:

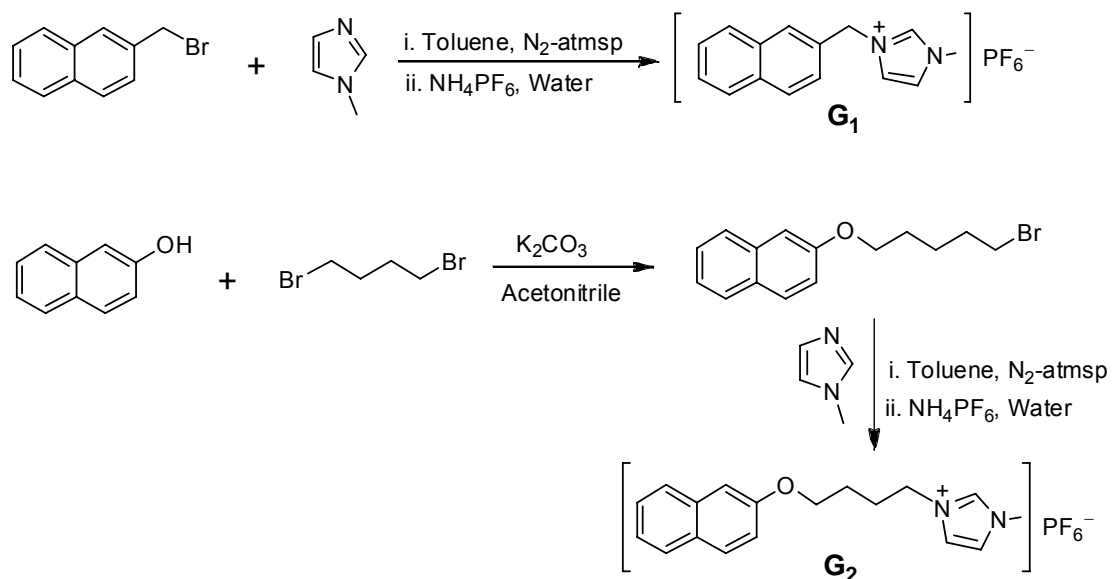

### 3. Synthesis of I:

2- Naphthol (2gm, 13.87mM) was dissolved in 40 ml of freshly dried acetonitrile in two neck round bottom flask in N<sub>2</sub>-atmosphere. To this solution K<sub>2</sub>CO<sub>3</sub> powder (3.25g, 23.57 mM) was added and the reaction mixture was stirred for 30 mint. After 30 mint. The colourless solution turned to light green solution. Then dibromobutane (14.97gm, 69.36mM) was added and the reaction mixture was refluxed for 24hr. After one day, the solvent was removed under reduced pressure and extracted three times with CHCl<sub>3</sub> and water. Organic layers were combined and dried over anhydrous sodium sulphate. Solvent was removed under reduced pressure to give crude product which was purified on Silica-gel column, using methanol:chloroform (1:99 v/v) as an eluent to yield **I** (2.3 gm, 60%), as a white solid. <sup>1</sup>H-NMR (200MHz, CDCl<sub>3</sub>, δ ppm) 7.79 - 7.72 (3H, m), 7.46 - 7.34 (2H, m), 7.17 (1H, s), 7.13 (1H, s), 4.11 (2H, t, *J* = 5.8), 3.52 (2H, t, *J* = 6.4), 2.04 - 2.01 (4H, m). (ESI – MS) calcd for C<sub>14</sub>H<sub>15</sub>BrO : 279.17, found : 279.43.

#### 4. Mass spectrum for H.2G<sub>1</sub>.

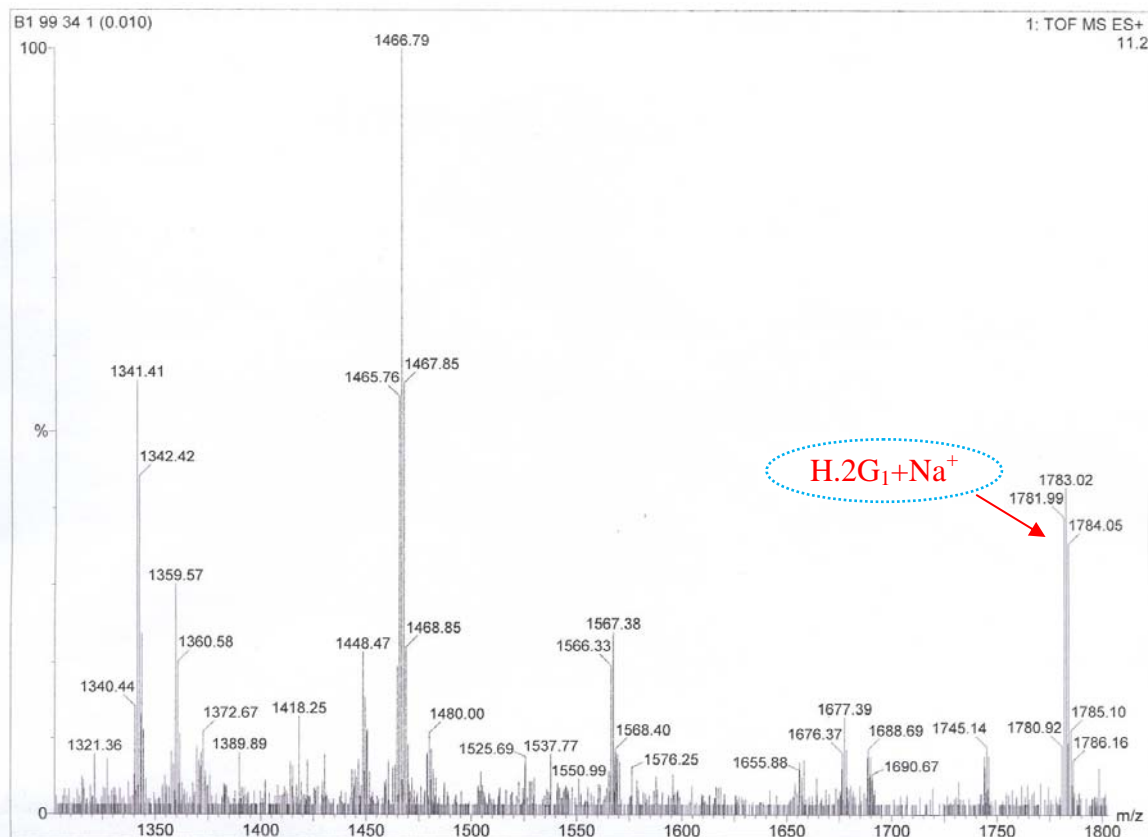

**ESI Figure 1:** ESI-mass spectrum for **H.2G<sub>1</sub>** using Micromass Q-ToF micro<sup>TM</sup>, equipped with ESI source and Q-ToF analyzer.

## 5. Mass spectrum For H.2G<sub>2</sub>:

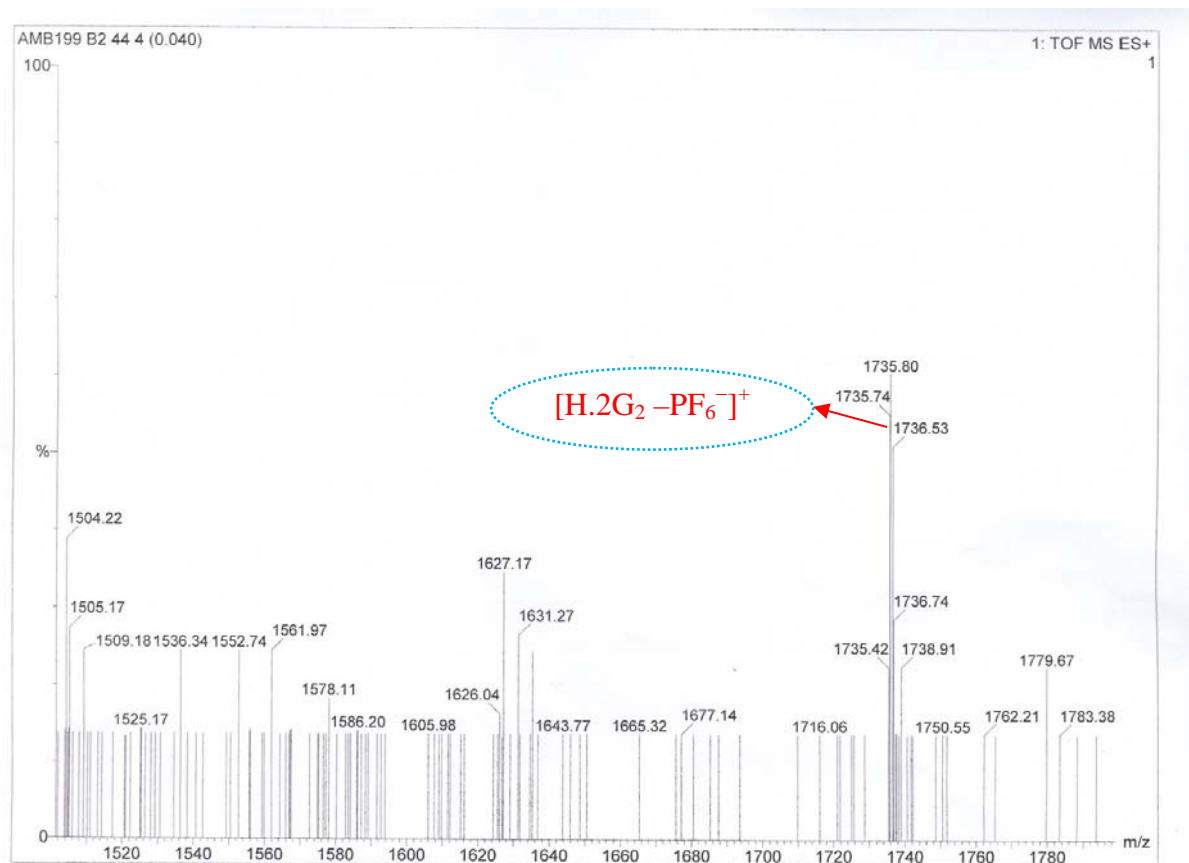

**ESI Figure 2:** ESI-mass spectrum for **H.2G<sub>2</sub>** using Micromass Q-Tof micro<sup>TM</sup>, equipped with ESI source and Q-Tof analyzer.

## 6. $^1\text{H}$ - NMR spectrum of A:

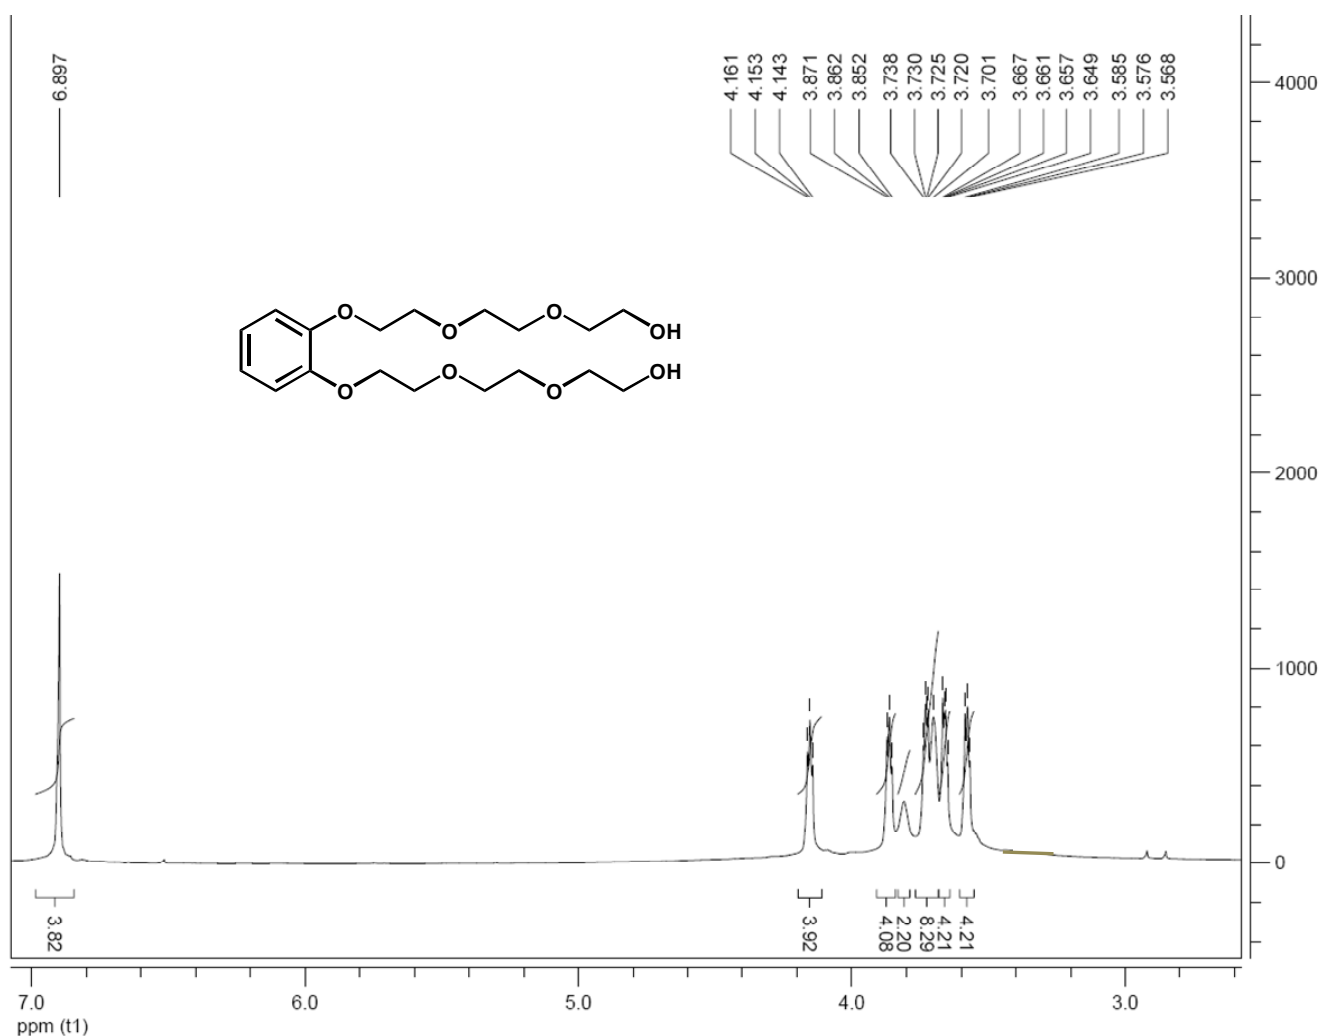

**ESI Figure 3:**  $^1\text{H}$  NMR spectrum of compound **A** in  $\text{CDCl}_3$

## 7. Mass spectrum of A:

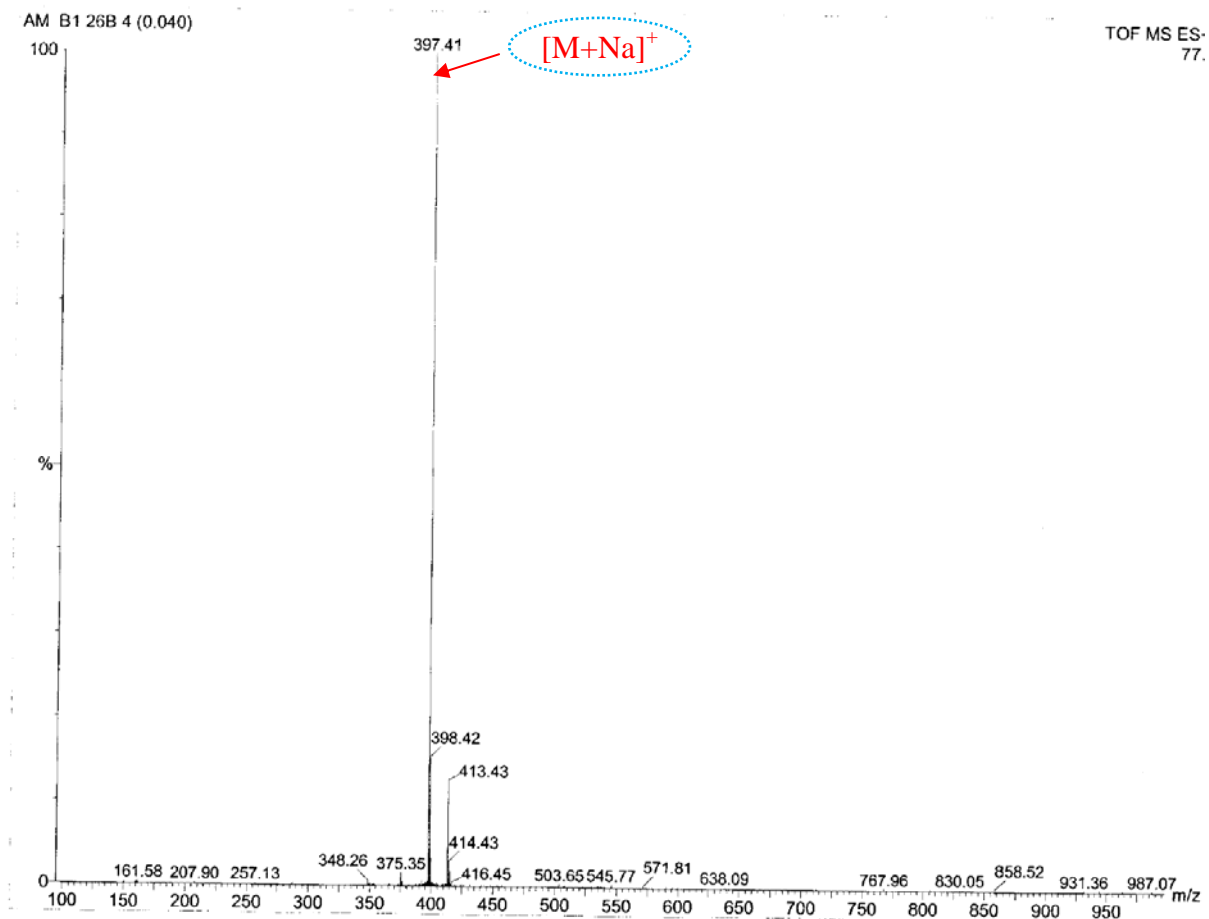

**ESI Figure 4:** ESI-mass spectrum of compound **A** using Micromass Q-Tof micro<sup>TM</sup>, equipped with ESI source and Q-Tof analyzer.

## 8. <sup>1</sup>H-NMR spectrum of 1:

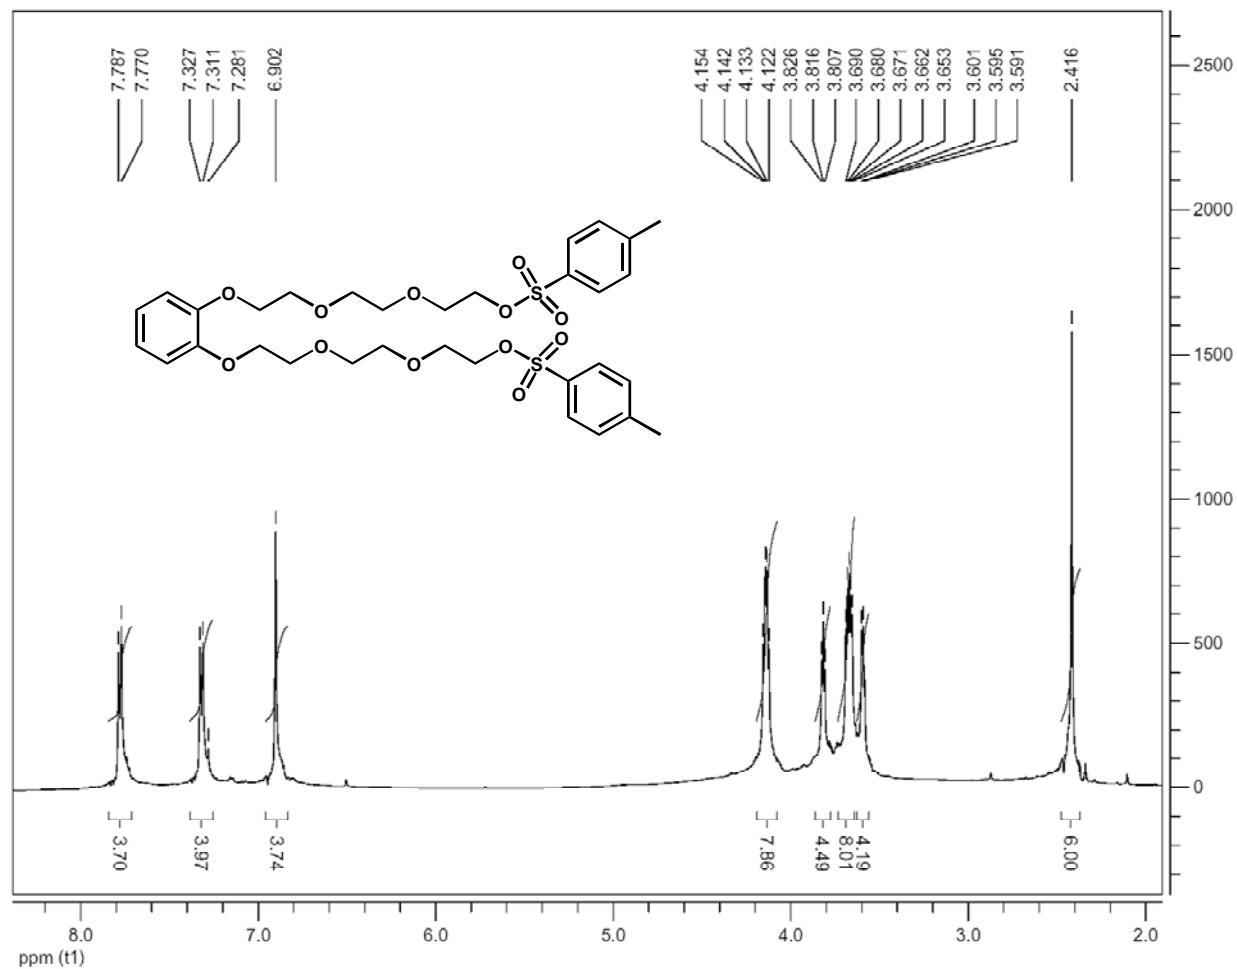

**ESI Figure 5:** <sup>1</sup>H NMR spectrum of compound 1 in CDCl<sub>3</sub>.

# 9. $^{13}\text{C}$ -NMR spectrum of **1**:

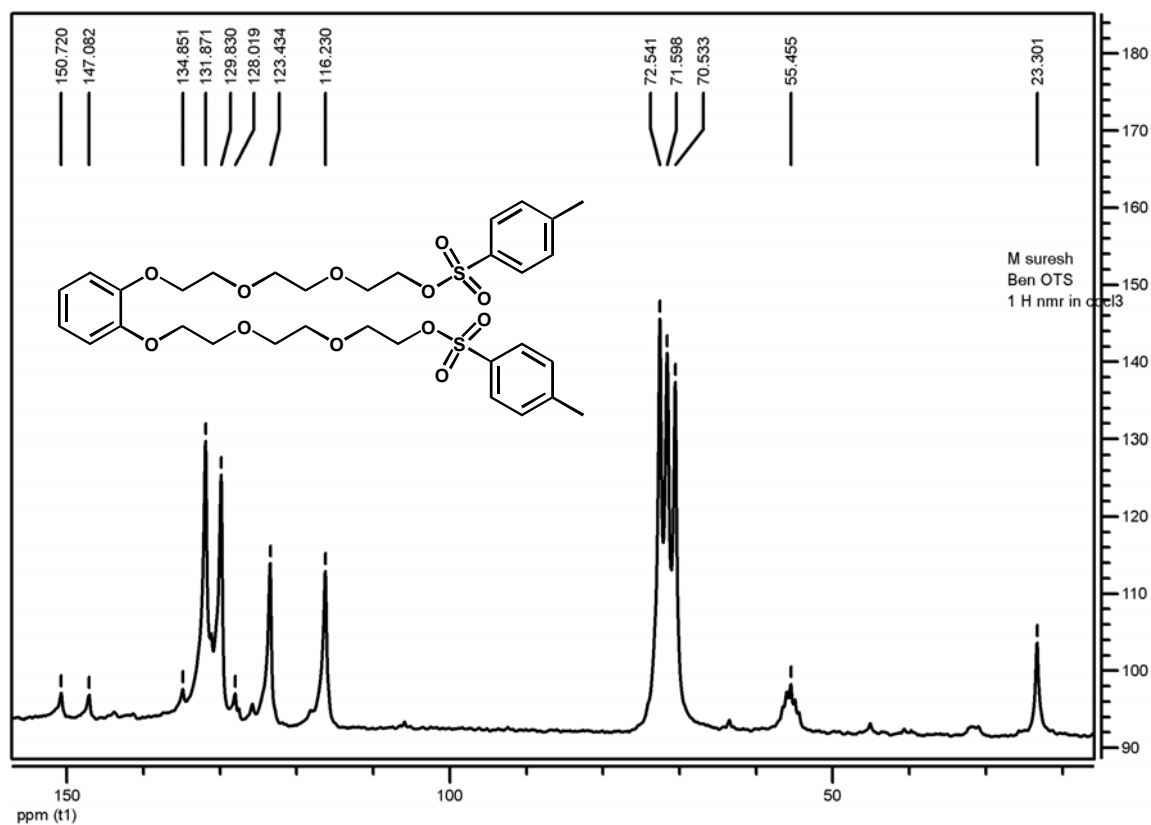

**ESI Figure 6:**  $^{13}\text{C}$ -NMR spectrum of compound **1** in  $\text{CDCl}_3$ .

## 10. Mass spectrum of 1:

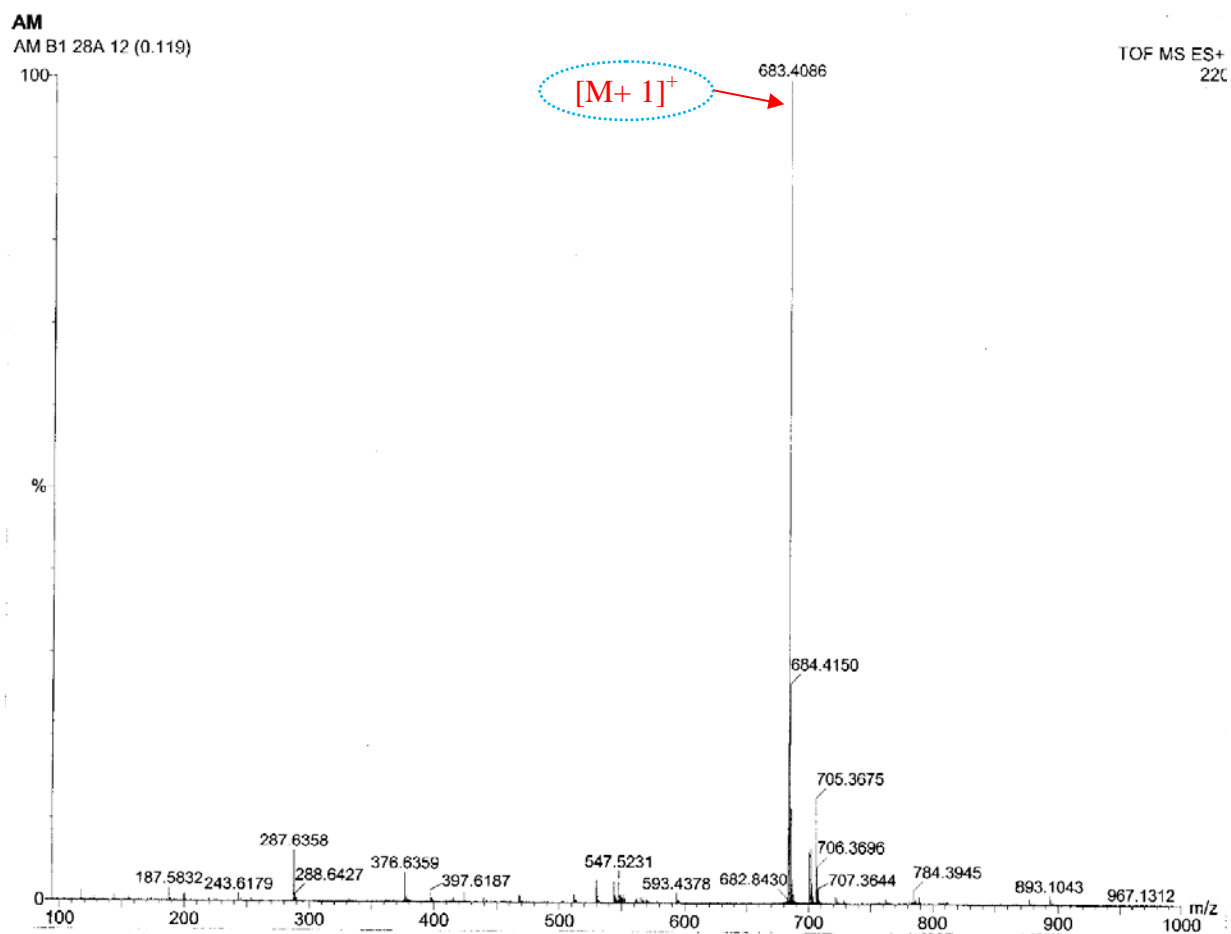

**ESI Figure 7:** ESI-mass spectrum of compound **1** using Micromass Q-ToF micro<sup>TM</sup>, equipped with ESI source and Q-ToF analyzer.

## 11. <sup>1</sup>H-NMR spectrum of 2:

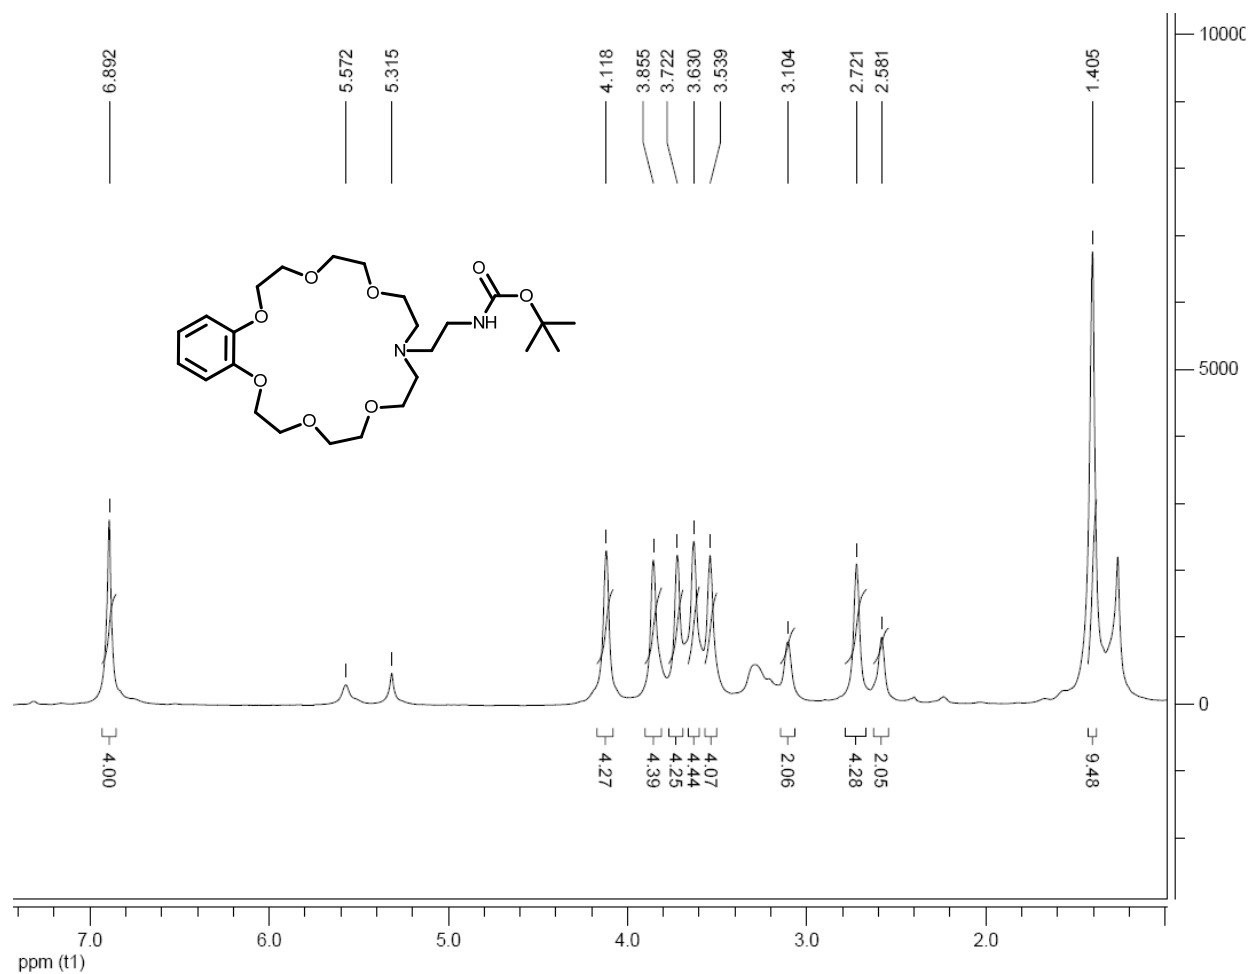

## 12. <sup>13</sup>C-NMR spectrum of 2:

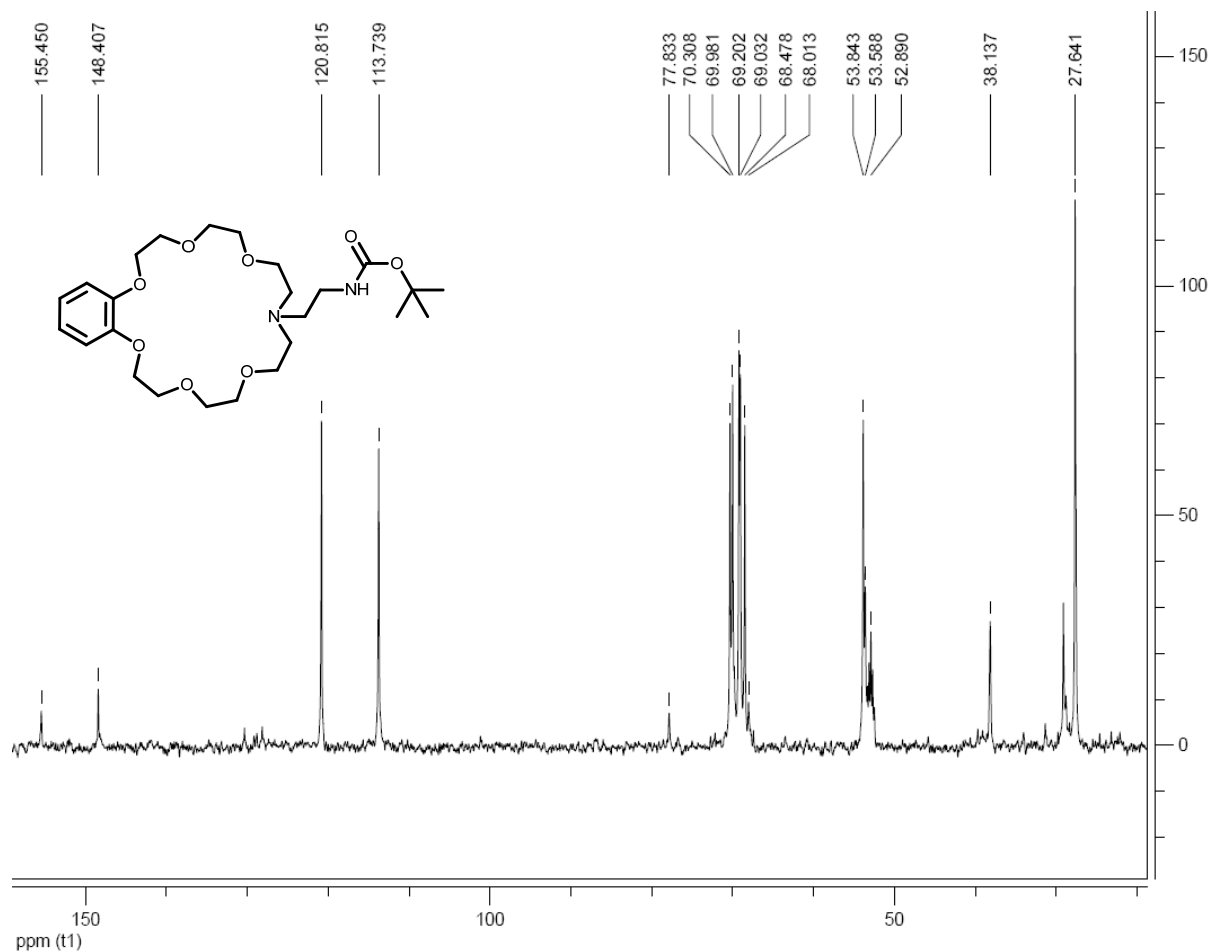

**ESI Figure 9:** <sup>13</sup>C-NMR spectrum of compound 2 in CD<sub>2</sub>Cl<sub>2</sub>.

### 13. Mass spectrum of 2:

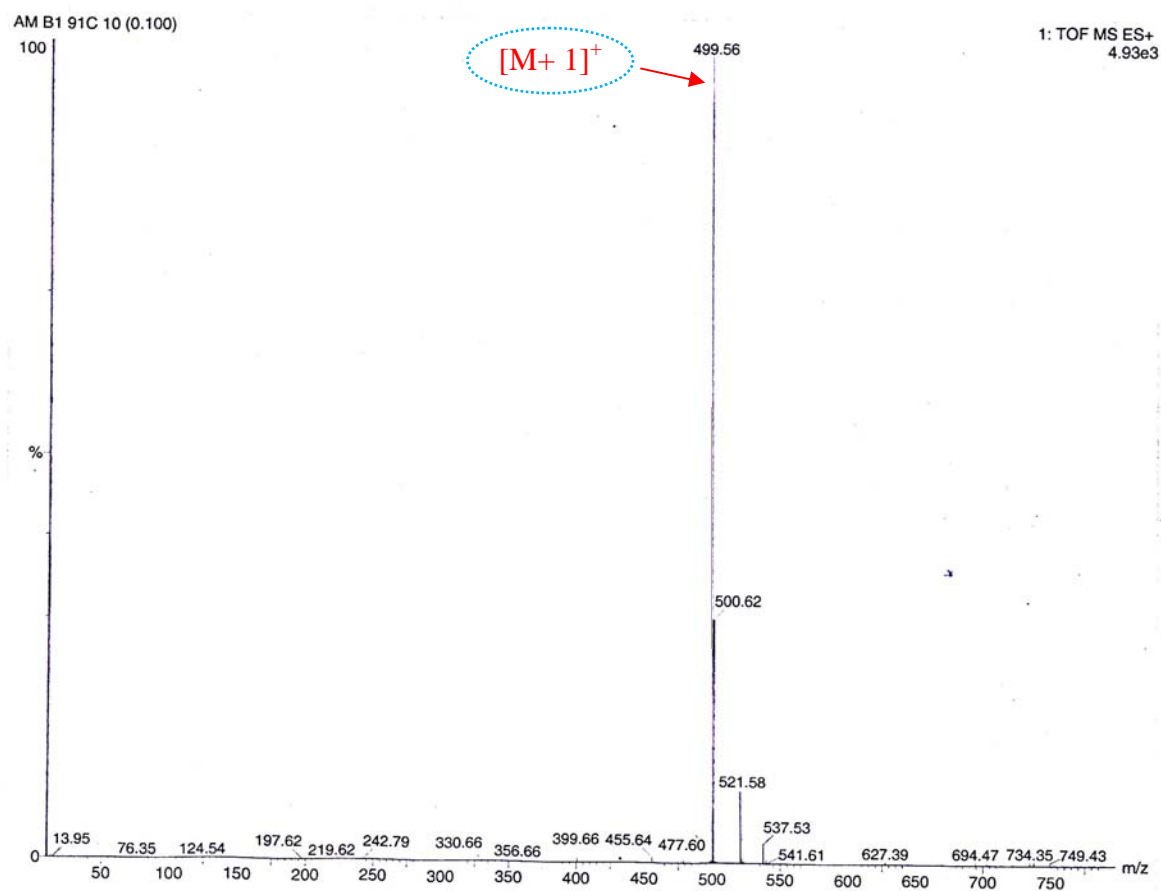

**ESI Figure 10:** ESI-mass spectrum of compound **2** using Micromass Q-Tof micro<sup>TM</sup>, equipped with ESI source and Q-Tof analyzer.

### 14. <sup>1</sup>H- NMR spectrum of 3:

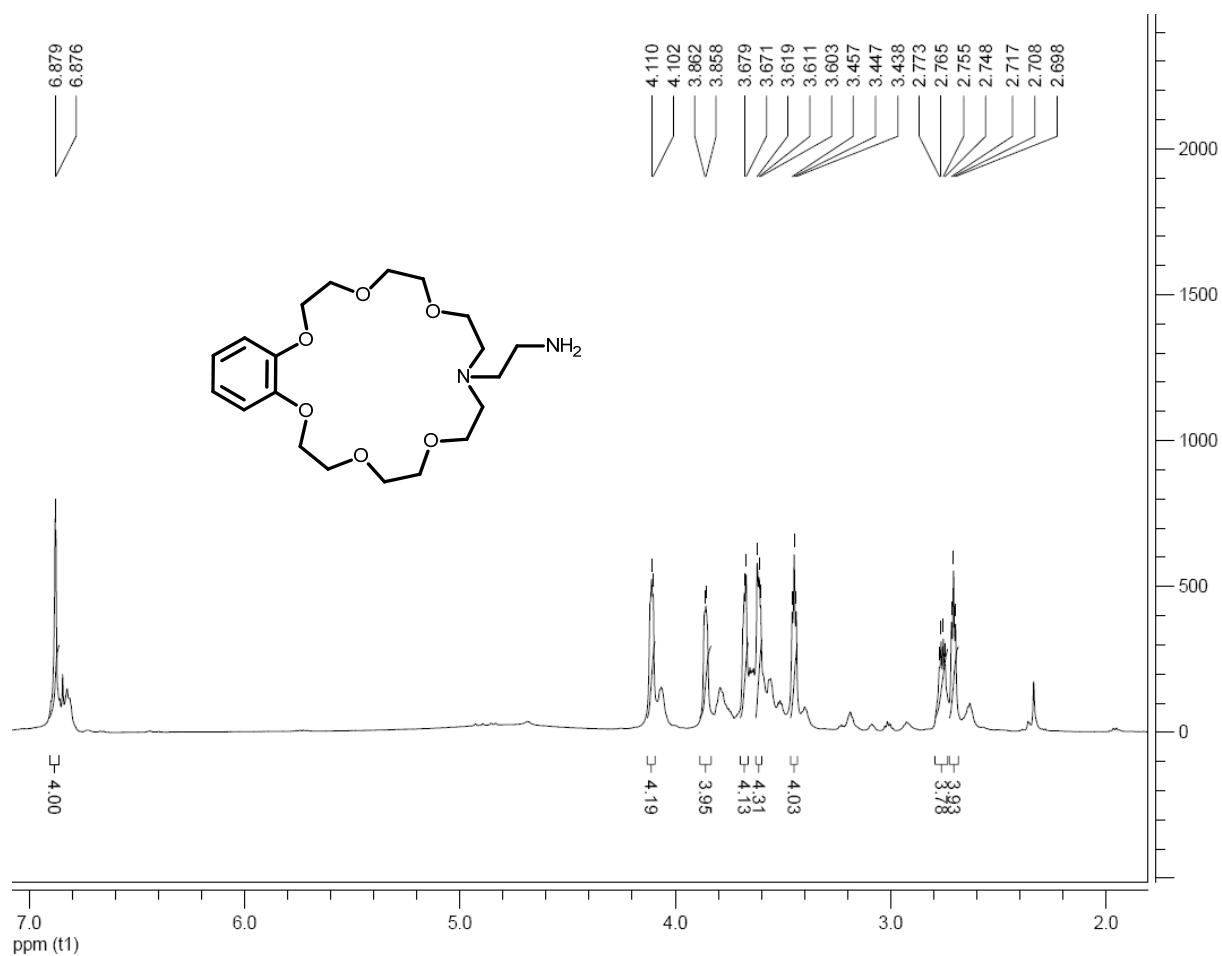

**ESI Figure 11:** <sup>1</sup>H NMR spectrum of compound **3** in CDCl<sub>3</sub>.

**15.  $^{13}\text{C}$ - NMR spectrum of **3**:**

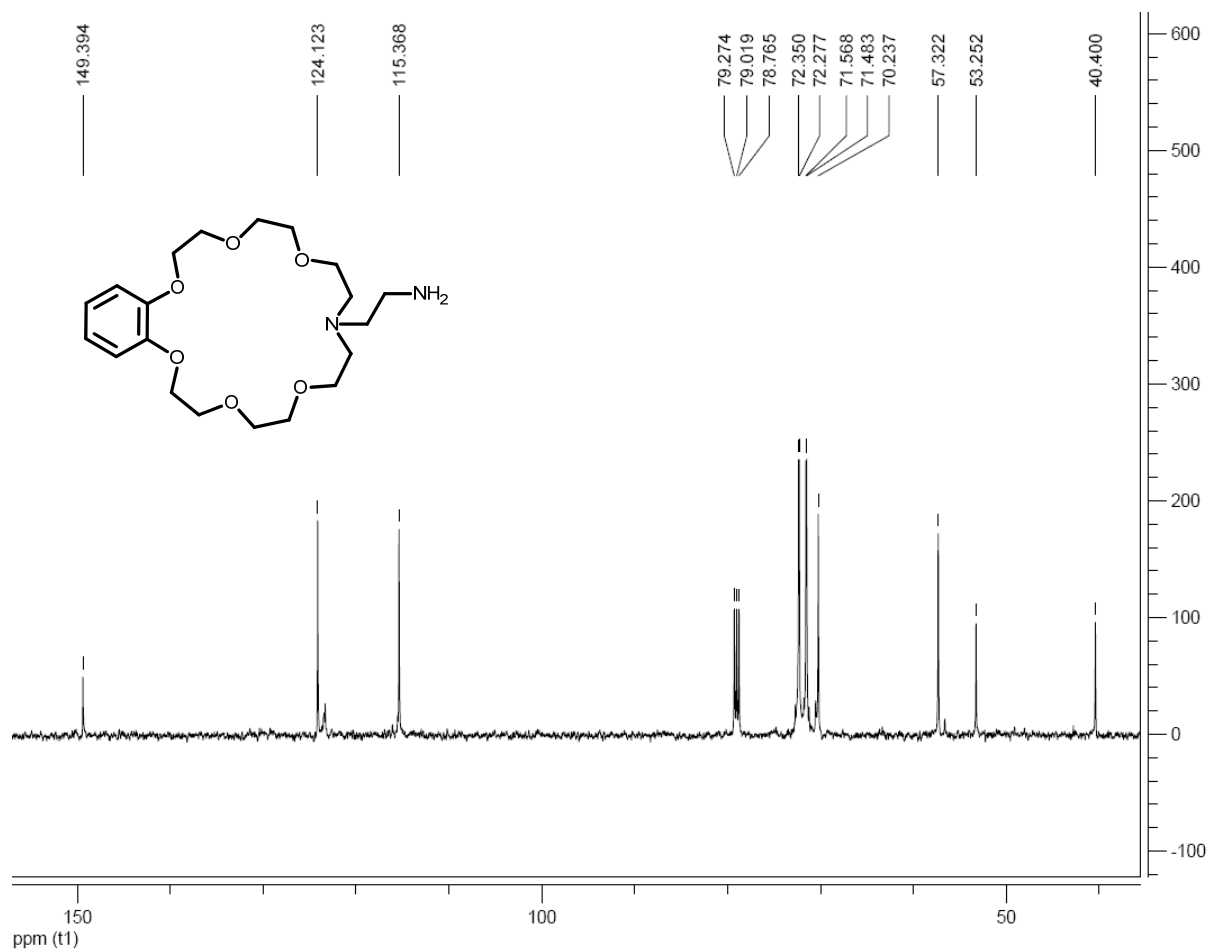

**ESI Figure 12:**  $^{13}\text{C}$ -NMR spectrum of compound **3** in  $\text{CDCl}_3$ .

## 16. Mass spectrum of 3:

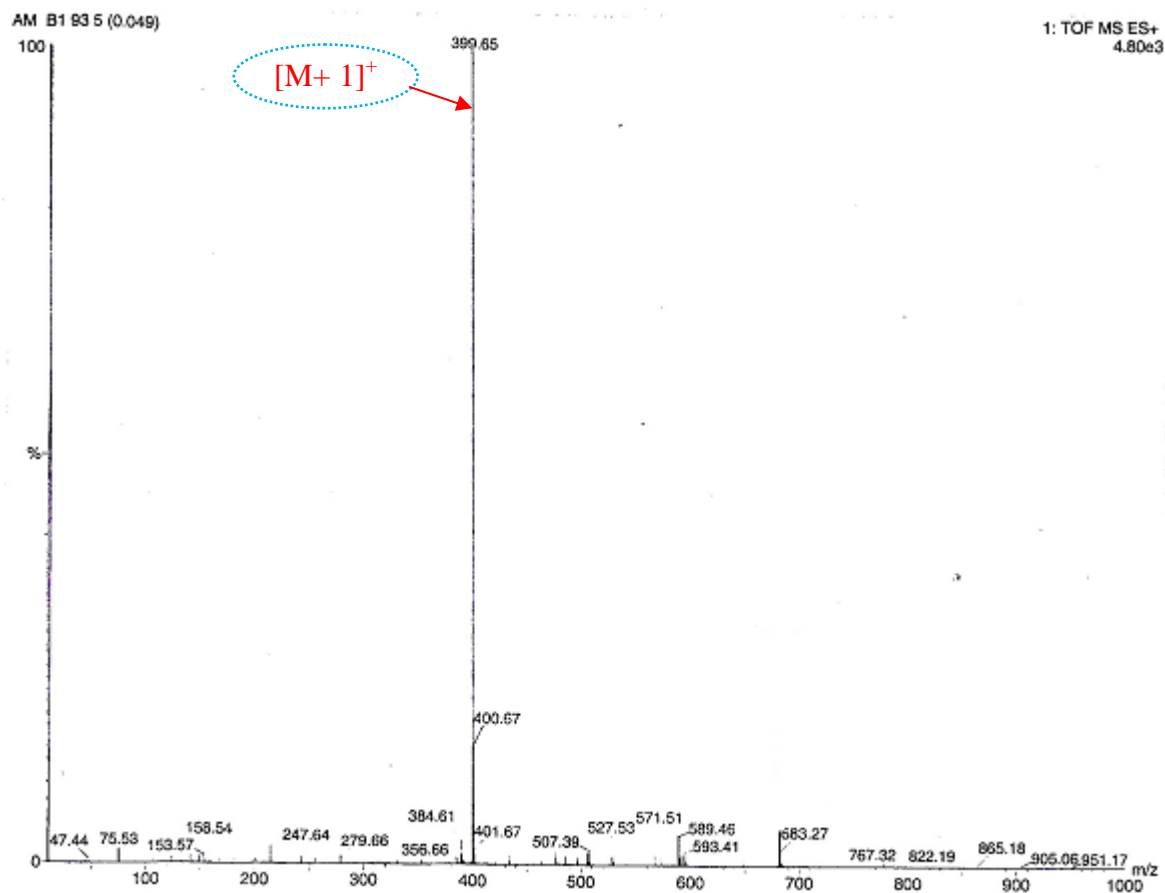

**ESI Figure 13:** ESI-mass spectrum of compound **3** using Micromass Q-Tof micro<sup>TM</sup>, equipped with ESI source and Q-Tof analyzer.

# **17. <sup>1</sup>H- NMR spectrum of H:**

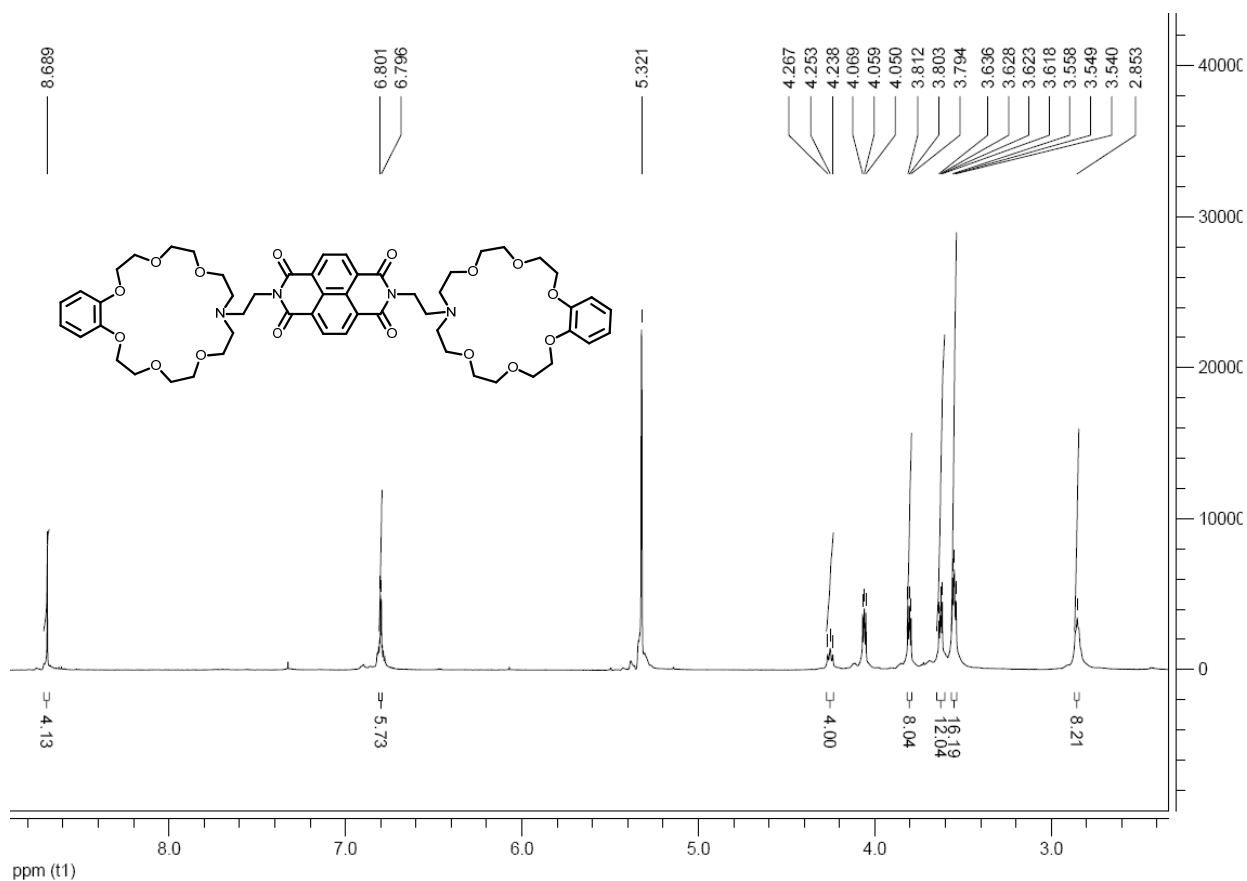

**ESI Figure 14:** <sup>1</sup>H NMR spectrum of compound **H** in CDCl<sub>3</sub>.

# **18. $^{13}\text{C}$ -NMR spectrum of H:**

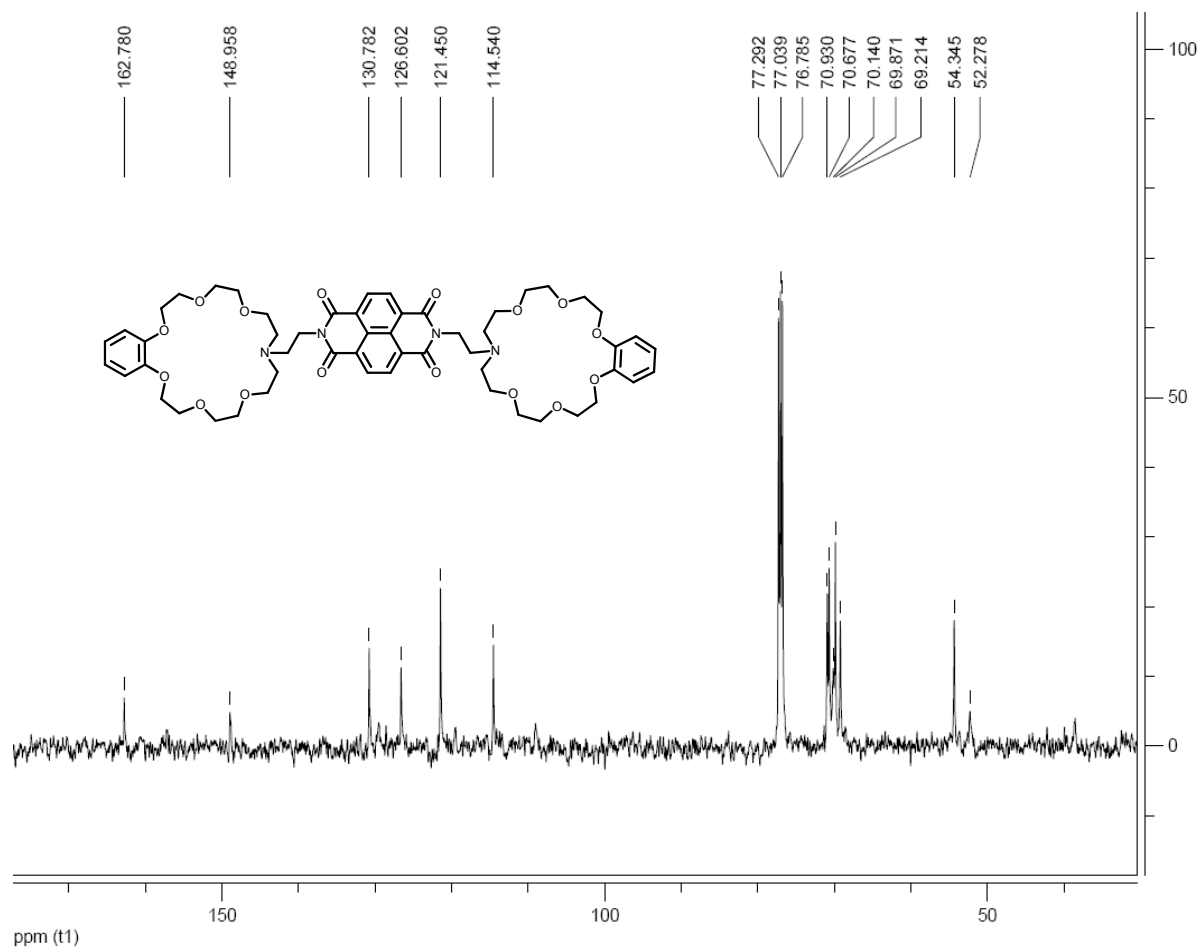

**ESI Figure 15:**  $^{13}\text{C}$ -NMR spectrum of compound H in  $\text{CDCl}_3$ .

## 19. Mass spectrum of H:

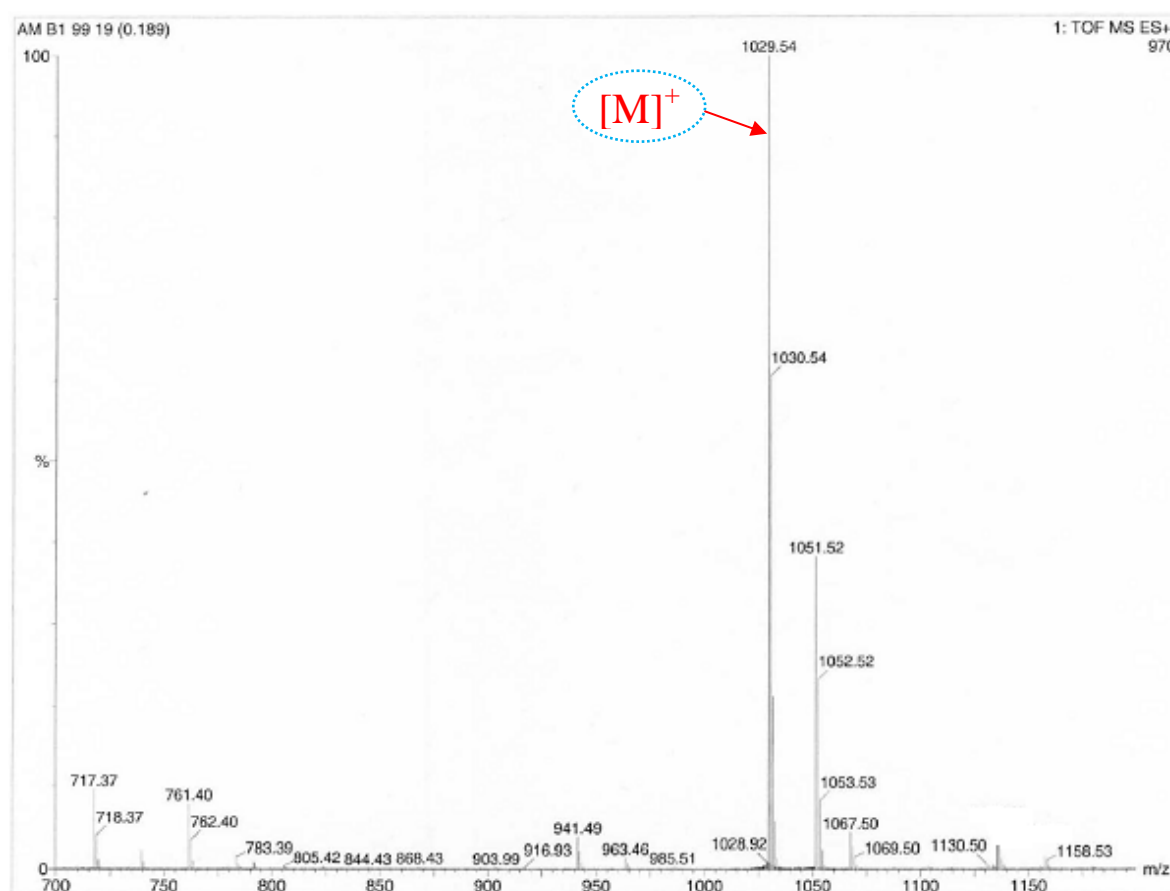

**ESI Figure 16:** ESI-mass spectrum of compound **H** using Micromass Q-Tof micro™, equipped with ESI source and Q-Tof analyzer.

## 20. HRMS spectrum of H.

### Elemental Composition Report

Page 1

#### Single Mass Analysis (displaying only valid results)

Tolerance = 10.0 PPM / DBE: min = -1.5, max = 50.0

Isotope cluster parameters: Separation = 1.0 Abundance = 1.0%

Monoisotopic Mass, Odd and Even Electron Ions

3224 formula(e) evaluated with 50 results within limits (up to 50 closest results for each mass)

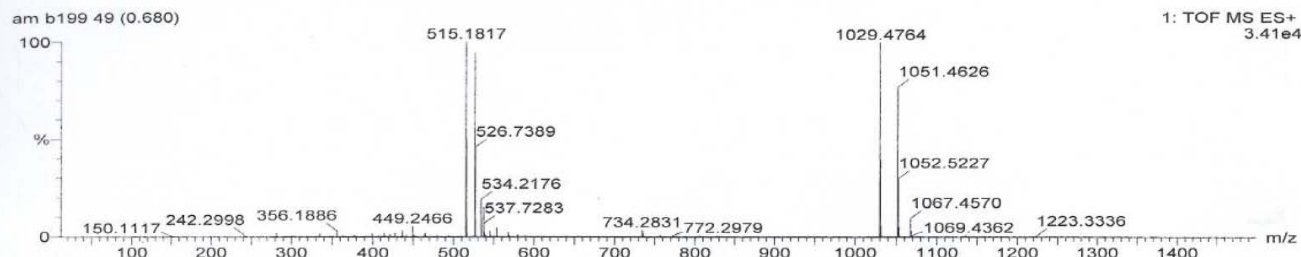

| Minimum:  |            |      |      |      | -1.5  |         |     |     |        |
|-----------|------------|------|------|------|-------|---------|-----|-----|--------|
| Maximum:  |            | 10.0 | 10.0 |      | 50.0  |         |     |     |        |
| Mass      | Calc. Mass | mDa  | PPM  | DBE  | Score | Formula |     |     |        |
| 1029.4764 | 1029.4765  | -0.1 | -0.1 | 27.5 | 24    | C62     | H70 | O12 | Na     |
|           | 1029.4762  | 0.2  | 0.2  | 31.5 | 23    | C60     | H65 | N6  | O10    |
|           | 1029.4760  | 0.4  | 0.4  | 45.5 | 48    | C75     | H62 | N2  | O Na   |
|           | 1029.4770  | -0.6 | -0.6 | 15.0 | 1     | C48     | H72 | N5  | O18 Na |
|           | 1029.4770  | -0.6 | -0.6 | 49.0 | 49    | C75     | H59 | N5  |        |
|           | 1029.4757  | 0.7  | 0.7  | 44.0 | 47    | C74     | H63 | N   | O4     |
|           | 1029.4776  | -1.2 | -1.1 | 31.0 | 25    | C62     | H67 | N3  | O11    |
|           | 1029.4752  | 1.2  | 1.2  | 28.0 | 22    | C60     | H68 | N3  | O11 Na |
|           | 1029.4778  | -1.4 | -1.4 | 32.5 | 26    | C63     | H66 | N4  | O8 Na  |
|           | 1029.4749  | 1.5  | 1.5  | 26.5 | 21    | C59     | H69 | N2  | O14    |
|           | 1029.4746  | 1.8  | 1.7  | 46.0 | 46    | C73     | H60 | N5  | Na     |
|           | 1029.4783  | -1.9 | -1.9 | 14.5 | 2     | C50     | H74 | N2  | O19 Na |
|           | 1029.4784  | -2.0 | -1.9 | 48.5 | 50    | C77     | H61 | N2  | O      |
|           | 1029.4744  | 2.0  | 2.0  | 44.5 | 45    | C72     | H61 | N4  | O3     |
|           | 1029.4789  | -2.5 | -2.4 | 30.5 | 27    | C64     | H69 | O12 |        |
|           | 1029.4738  | 2.6  | 2.5  | 28.5 | 20    | C58     | H66 | N6  | O10 Na |
|           | 1029.4792  | -2.8 | -2.7 | 32.0 | 28    | C65     | H68 | N   | O9 Na  |
|           | 1029.4735  | 2.9  | 2.8  | 27.0 | 19    | C57     | H67 | N5  | O13    |
|           | 1029.4794  | -3.0 | -2.9 | 18.0 | 3     | C50     | H71 | N5  | O18    |
|           | 1029.4733  | 3.1  | 3.0  | 41.0 | 44    | C72     | H64 | N   | O4 Na  |
|           | 1029.4797  | -3.3 | -3.2 | 19.5 | 5     | C51     | H70 | N6  | O15 Na |
|           | 1029.4730  | 3.4  | 3.3  | 39.5 | 42    | C71     | H65 | O7  |        |
|           | 1029.4802  | -3.8 | -3.7 | 35.5 | 29    | C65     | H65 | N4  | O8     |
|           | 1029.4725  | 3.9  | 3.8  | 23.5 | 18    | C57     | H70 | N2  | O14 Na |
|           | 1029.4805  | -4.1 | -4.0 | 37.0 | 31    | C66     | H64 | N5  | O5 Na  |
|           | 1029.4722  | 4.2  | 4.1  | 22.0 | 16    | C56     | H71 | N   | O17    |
|           | 1029.4808  | -4.4 | -4.2 | 17.5 | 6     | C52     | H73 | N2  | O19    |
|           | 1029.4720  | 4.4  | 4.3  | 41.5 | 41    | C70     | H62 | N4  | O3 Na  |
|           | 1029.4810  | -4.6 | -4.5 | 19.0 | 9     | C53     | H72 | N3  | O16 Na |
|           | 1029.4717  | 4.7  | 4.6  | 40.0 | 38    | C69     | H63 | N3  | O6     |
|           | 1029.4816  | -5.2 | -5.0 | 35.0 | 32    | C67     | H67 | N   | O9     |
|           | 1029.4711  | 5.3  | 5.1  | 24.0 | 15    | C55     | H68 | N5  | O13 Na |
|           | 1029.4819  | -5.5 | -5.3 | 36.5 | 34    | C68     | H66 | N2  | O6 Na  |
|           | 1029.4709  | 5.5  | 5.4  | 22.5 | 13    | C54     | H69 | N4  | O16    |
|           | 1029.4821  | -5.7 | -5.5 | 22.5 | 11    | C53     | H69 | N6  | O15    |
|           | 1029.4706  | 5.8  | 5.6  | 36.5 | 36    | C69     | H66 | O7  | Na     |
|           | 1029.4824  | -6.0 | -5.8 | 18.5 | 12    | C55     | H74 | O17 | Na     |
|           | 1029.4703  | 6.1  | 5.9  | 40.5 | 35    | C67     | H61 | N6  | O5     |
|           | 1029.4829  | -6.5 | -6.3 | 40.0 | 37    | C68     | H63 | N5  | O5     |
|           | 1029.4698  | 6.6  | 6.4  | 19.0 | 10    | C54     | H72 | N   | O17 Na |
|           | 1029.4832  | -6.8 | -6.6 | 41.5 | 39    | C69     | H62 | N6  | O2 Na  |
|           | 1029.4695  | 6.9  | 6.7  | 17.5 | 8     | C53     | H73 | O20 |        |
|           | 1029.4834  | -7.0 | -6.8 | 22.0 | 14    | C55     | H71 | N3  | O16    |

ESI Figure 17: HRMS spectrum of compound H using Micromass Q-Tof micro<sup>TM</sup>, equipped with ESI source and Q-Tof analyzer.

## 21. <sup>1</sup>H- NMR spectrum of I:

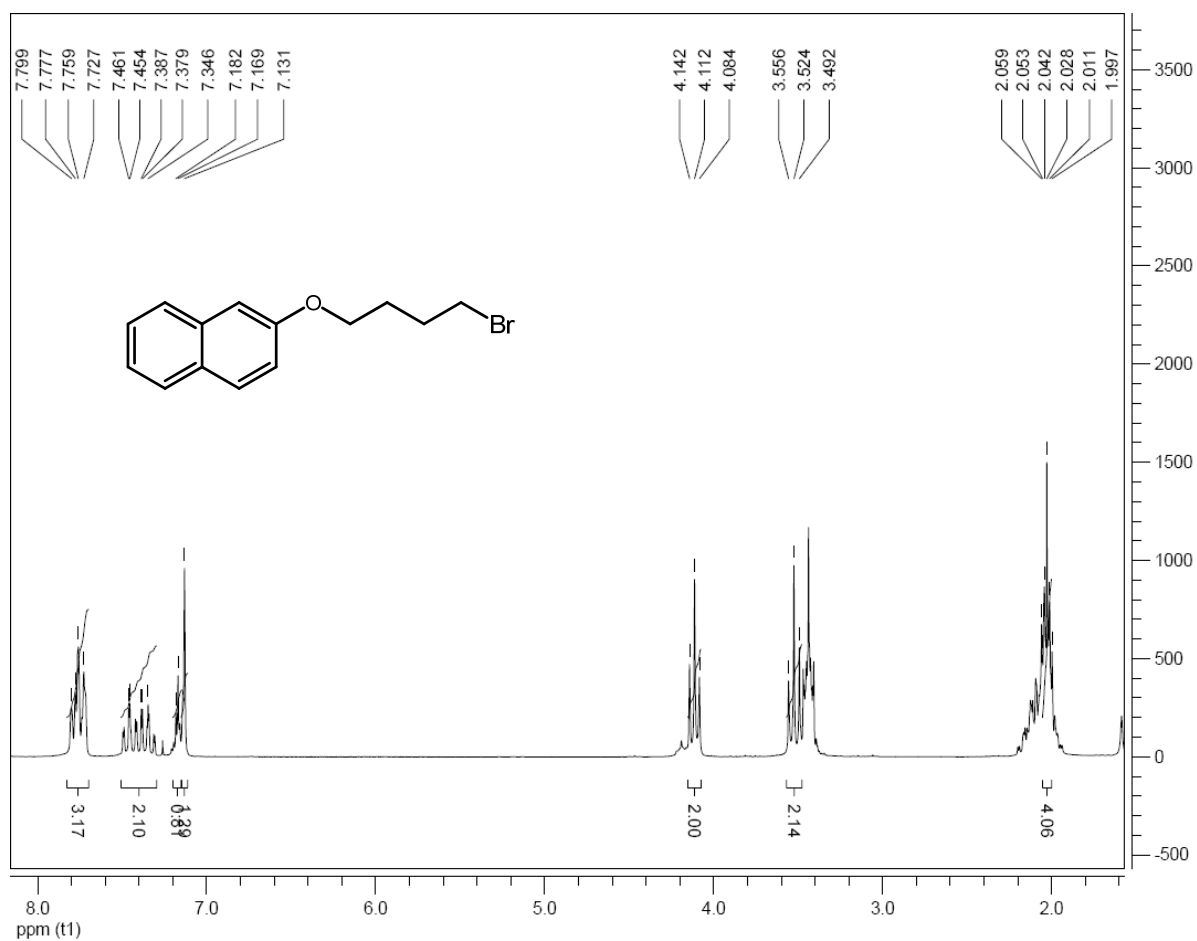

ESI Figure 18: <sup>1</sup>H-NMR spectrum of compound I in CDCl<sub>3</sub>.

## 22. Mass spectrum of I:

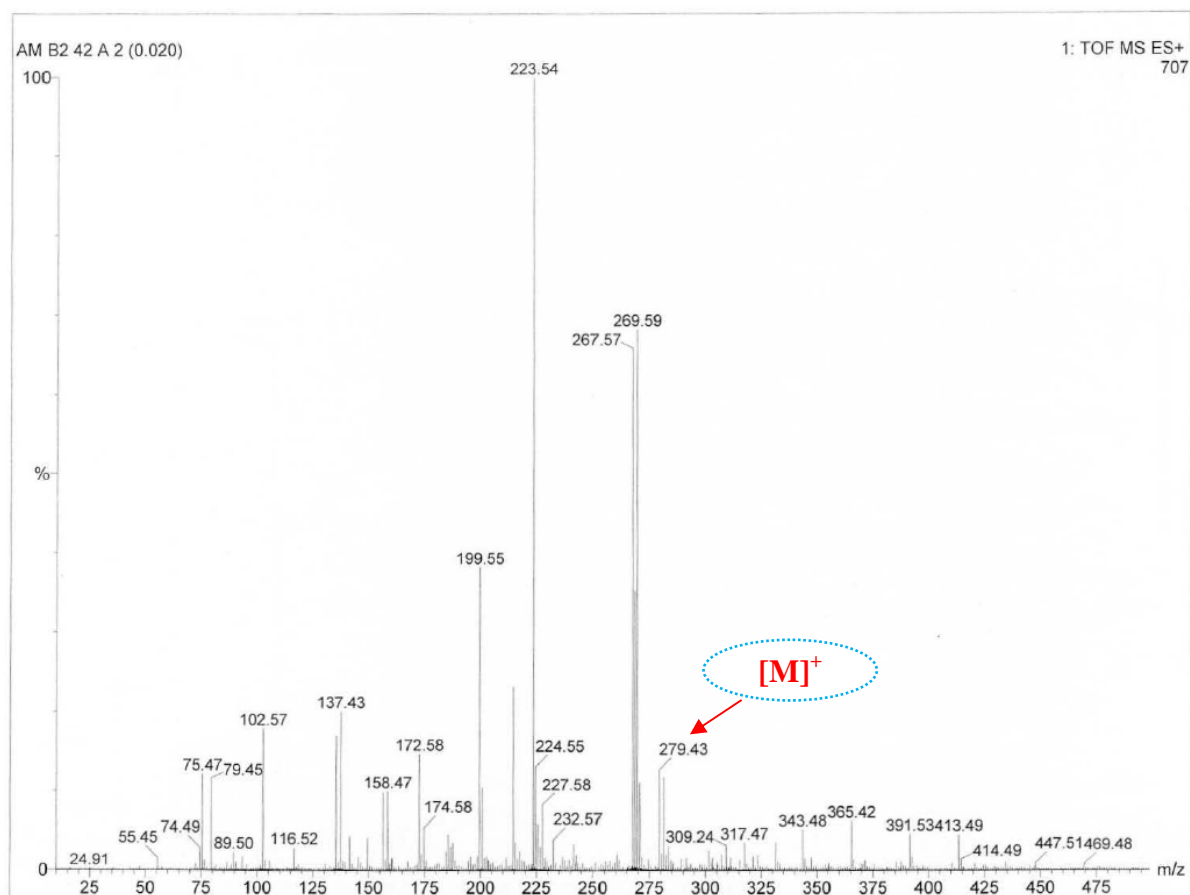

**ESI Figure 19:** ESI-mass spectrum of compound **I** using Micromass Q-Tof micro<sup>TM</sup>, equipped with ESI source and Q-Tof analyzer.

## 23. $^1\text{H}$ -NMR spectrum of **G<sub>2</sub>**:

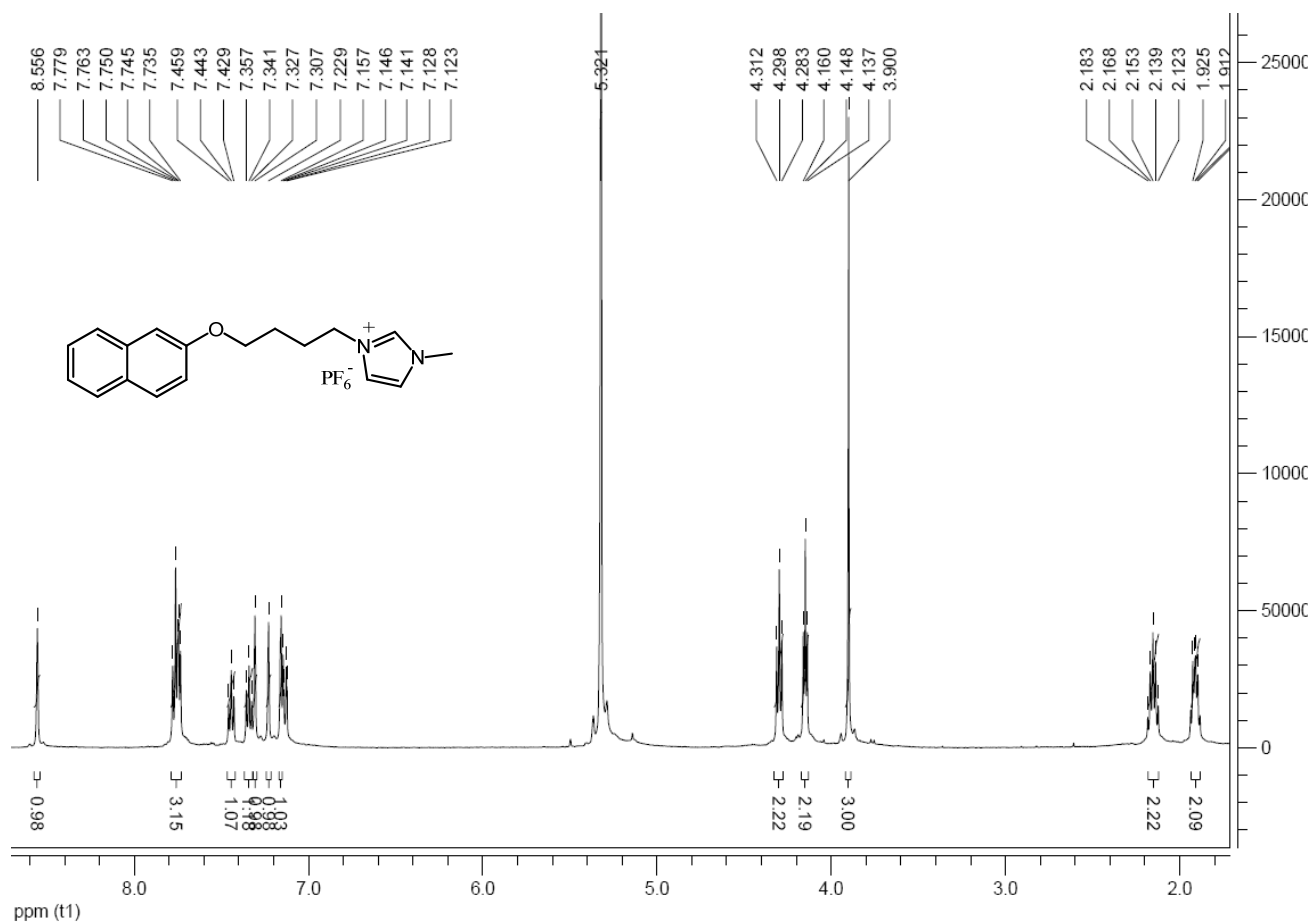

ESI Figure 20:  $^1\text{H}$ -NMR spectrum of compound **G<sub>2</sub>** in  $\text{CD}_2\text{Cl}_2$ .

**24.  $^{13}\text{C}$ - NMR spectrum of  $\text{G}_2$ :**

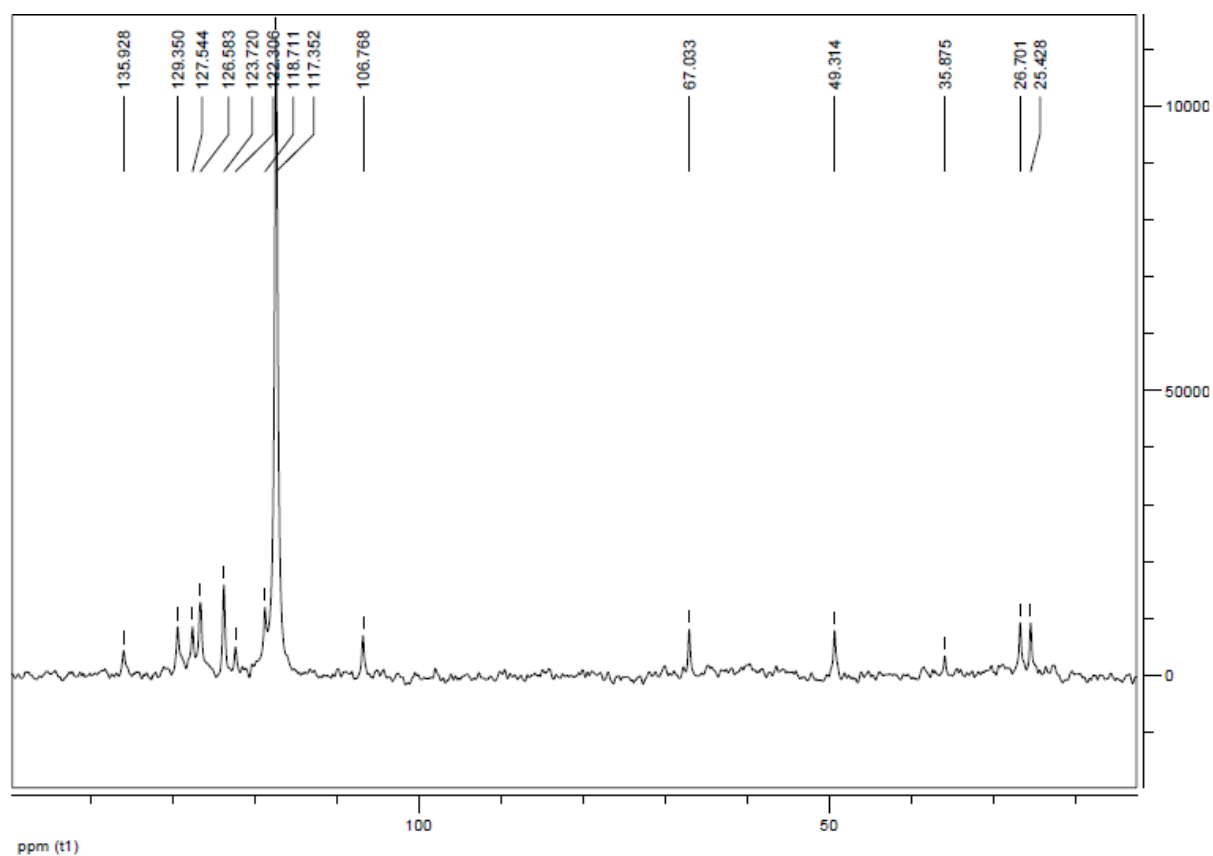

**ESI Figure 21:**  $^{13}\text{C}$ -NMR spectrum of compound  $\text{G}_2$  in  $\text{CD}_3\text{CN}$ .

## 25. Mass spectrum of G<sub>2</sub>:

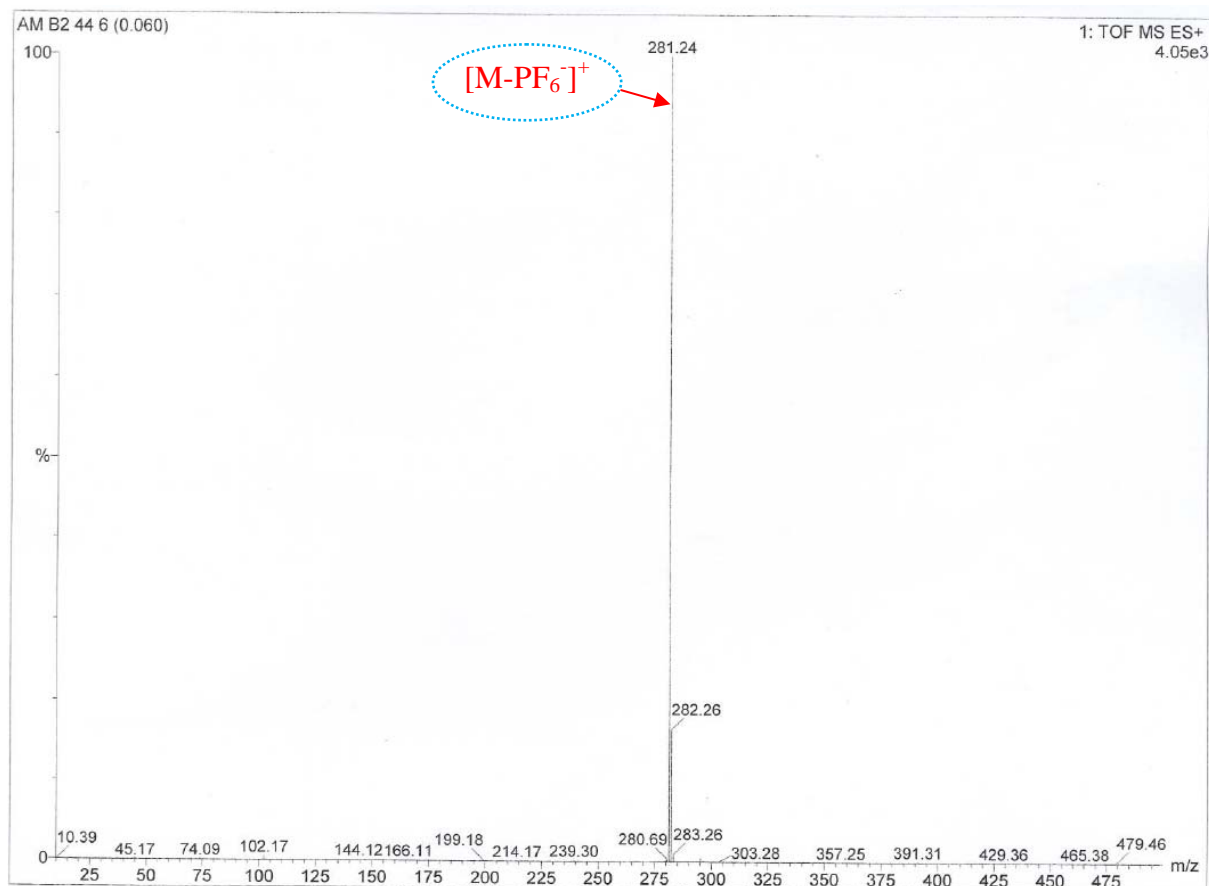

**ESI Figure 22:** ESI-mass spectrum of compound **G<sub>2</sub>** using Micromass Q-Tof micro<sup>TM</sup>, equipped with ESI source and Q-Tof analyzer.

## 26. $^1\text{H}$ - NMR spectrum of **G<sub>1</sub>**:

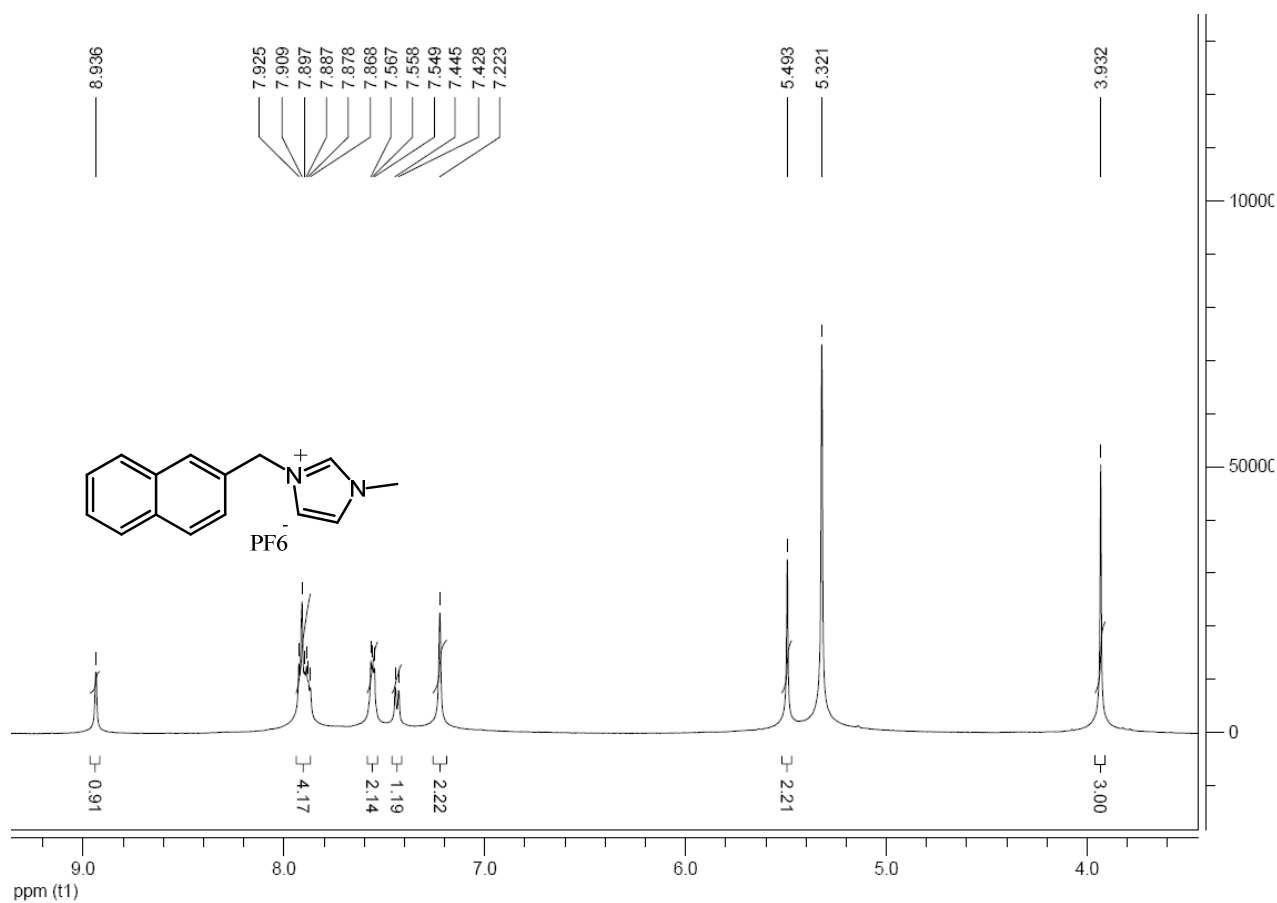

**ESI Figure 23:**  $^1\text{H}$ -NMR spectrum of compound **G<sub>1</sub>** in  $\text{CD}_2\text{Cl}_2$ .

**27.  $^{13}\text{C}$ - NMR spectrum of  $\text{G}_1$ :**

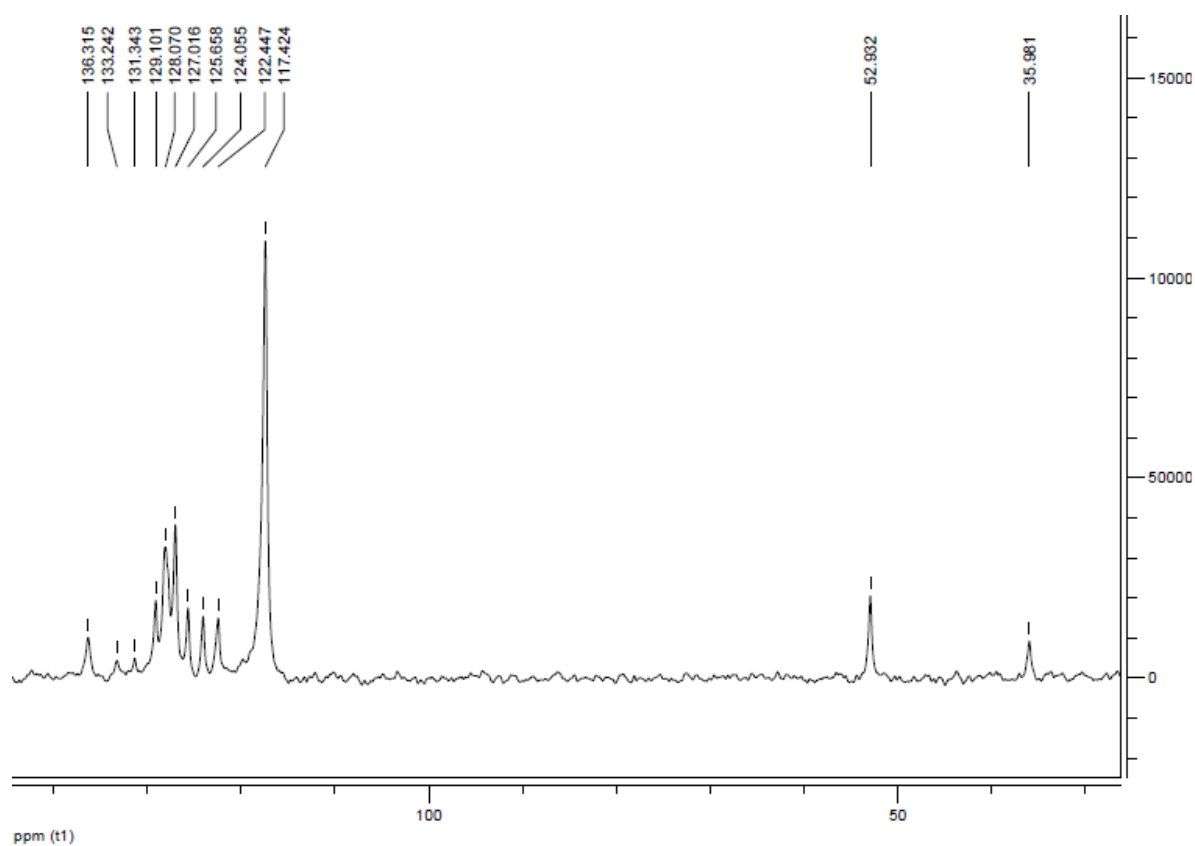

**ESI Figure 24:**  $^{13}\text{C}$ -NMR spectrum of compound  $\text{G}_1$  in  $\text{CD}_3\text{CN}$ .

## 28. Mass spectrum of G<sub>1</sub>:

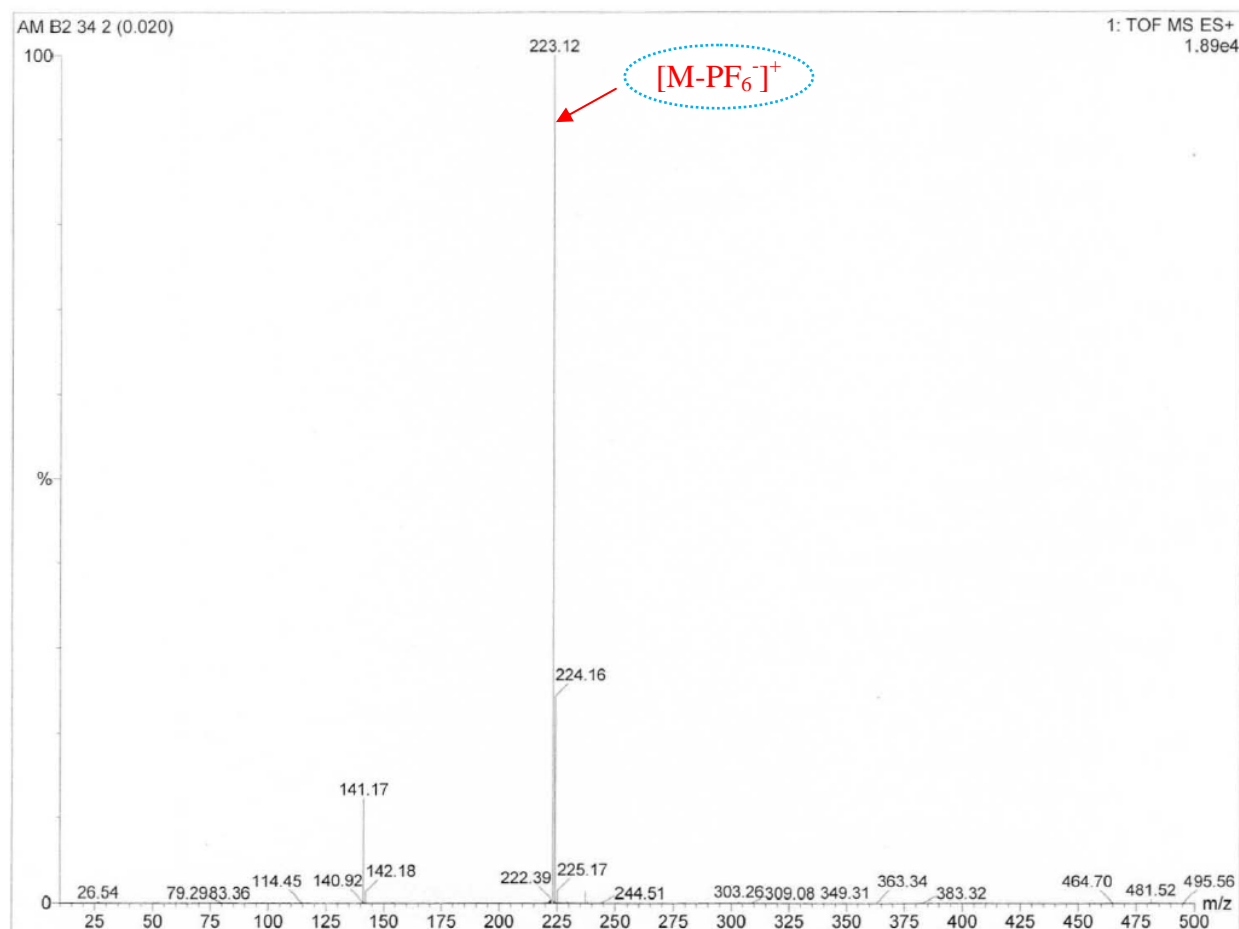

**ESI Figure 25:** ESI-mass spectrum of compound **G<sub>1</sub>** using Micromass Q-Tof micro<sup>TM</sup>, equipped with ESI source and Q-Tof analyzer.

## 29. $^1\text{H}$ -NMR spectrum of H, $\text{G}_1$ and $\text{H} \cdot 2\text{G}_1$ .

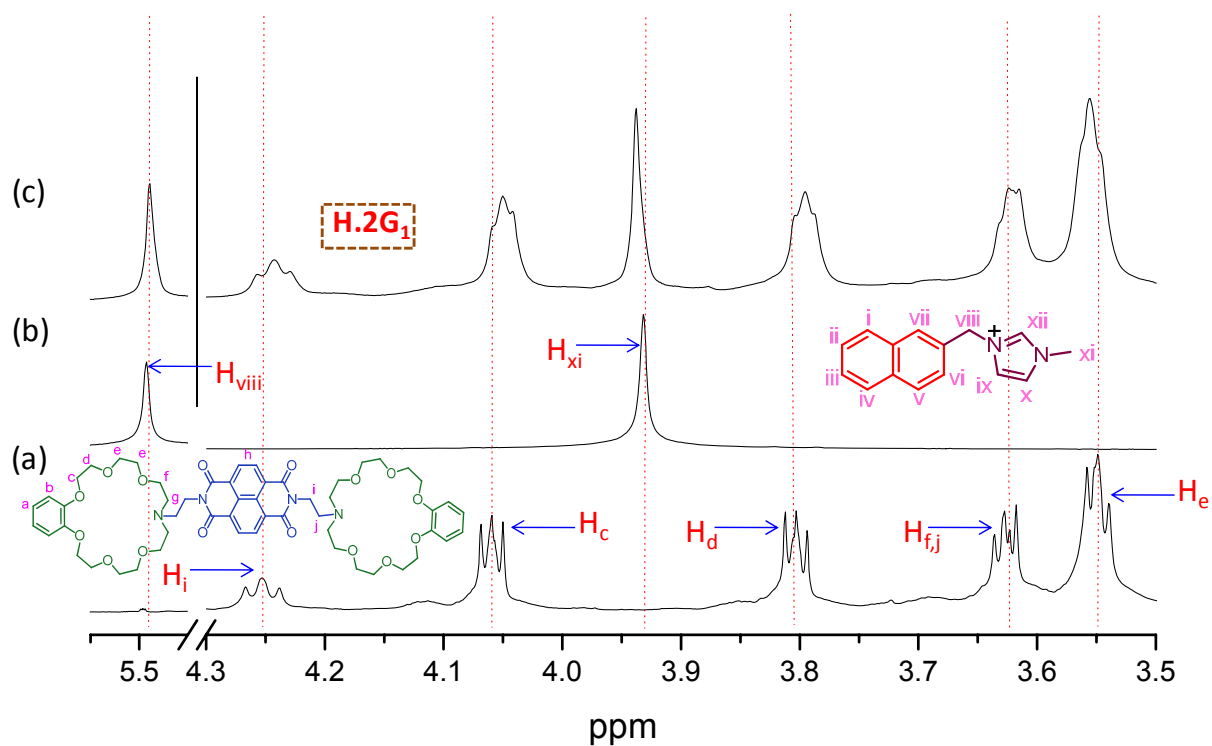

**ESI Figure 26:**  $^1\text{H}$ -NMR spectra recorded in  $\text{CD}_2\text{Cl}_2$  at  $25^\circ\text{C}$  of (a) 5.43mM **H**; (b) in presence of 10.89 mM **G**<sub>1</sub> and (c) in presence of 10.89mM of **G**<sub>1</sub>.

### 30. $^1\text{H}$ -NMR spectrum of $\text{H}$ , $\text{G}_2$ and $\text{H} \cdot 2\text{G}_2$ .

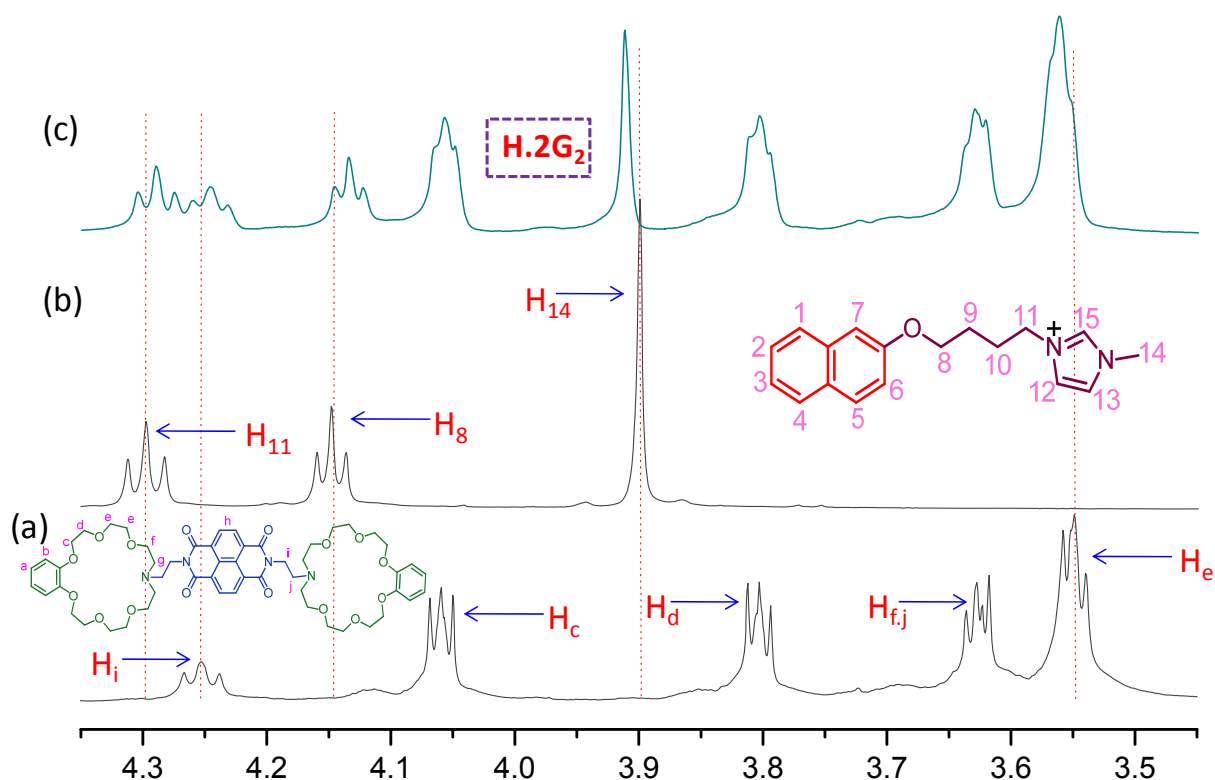

**ESI Figure 27:**  $^1\text{H}$ -NMR spectra recorded in  $\text{CD}_2\text{Cl}_2$  at  $25^\circ\text{C}$  of (a) 4.68mM  $\text{H}$ ; (b) ) in presence of 9.38mM  $\text{G}_2$  and (c) ) in presence of 9.38mM  $\text{G}_2$  and 4.68mM  $\text{H}$ .

### 31. Stern-Volmer plot of H.2G<sub>1</sub> & H.2G<sub>2</sub>:

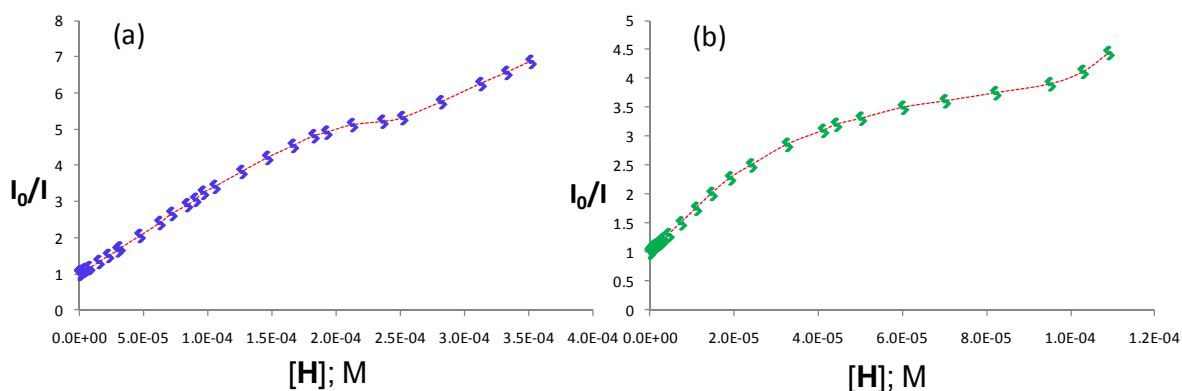

**ESI Figure 28:** Stern-Volmer Plots for emission quenching for (a) H.2G<sub>1</sub> system and (b) H.2G<sub>2</sub> system upon addition of H.

### 32. $^1\text{H}$ -NMR spectrum of $\text{H.2G}_2$ in the presence of methanol.

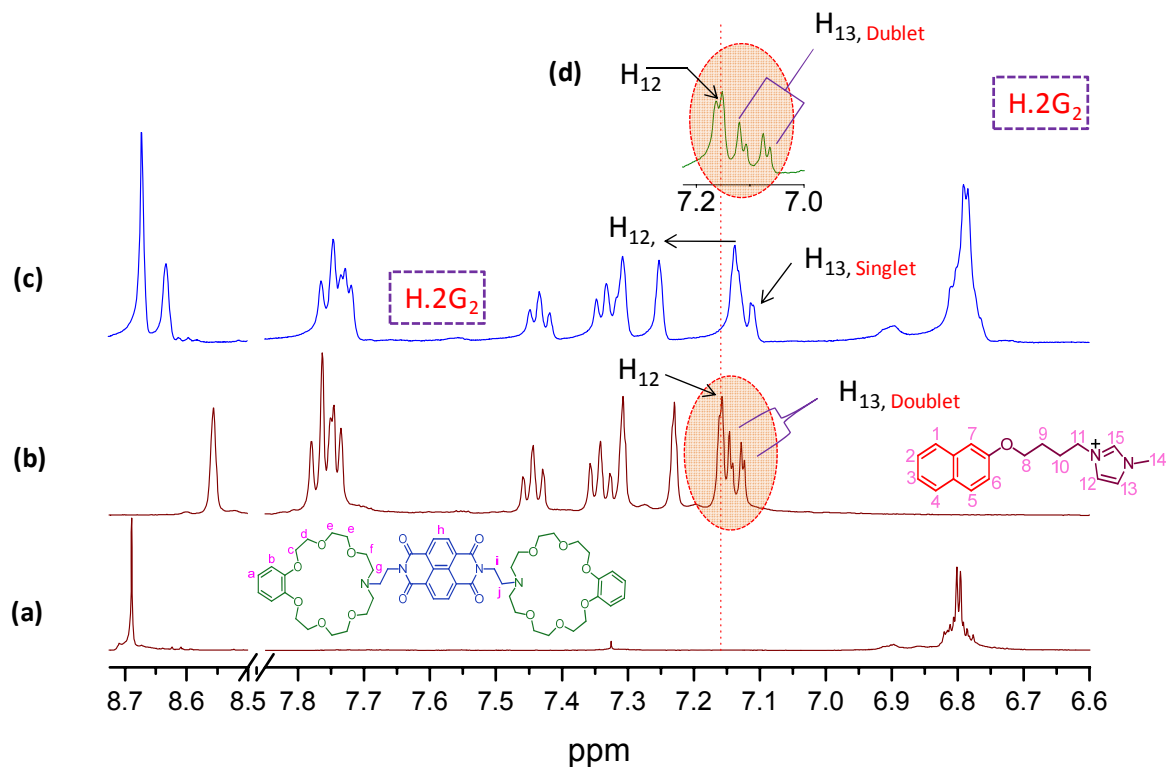

**ESI Figure 29:**  $^1\text{H}$ -NMR spectra recorded in  $\text{CD}_2\text{Cl}_2$  at  $25^\circ\text{C}$  of (a) 4.68mM  $\text{H}$ ; (b) 9.38mM  $\text{G}_2$  and (c) in presence of 9.38mM  $\text{G}_2$  and 4.68mM  $\text{H}$ ; (d) Partial spectra of  $\text{H.2G}_2$  in the presence of  $\text{CH}_3\text{OD}$ . The doublet for  $\text{H}_{13}$  of  $\text{G}_2$ , which disappeared due to the formation of the threaded complex  $\text{H.2G}_2$ , reappeared on addition of polar solvent like  $\text{CH}_3\text{OD}$ —supporting the de-threading phenomena in polar solvent.

### 33. 2D-COSY spectrum of H.2G<sub>2</sub>

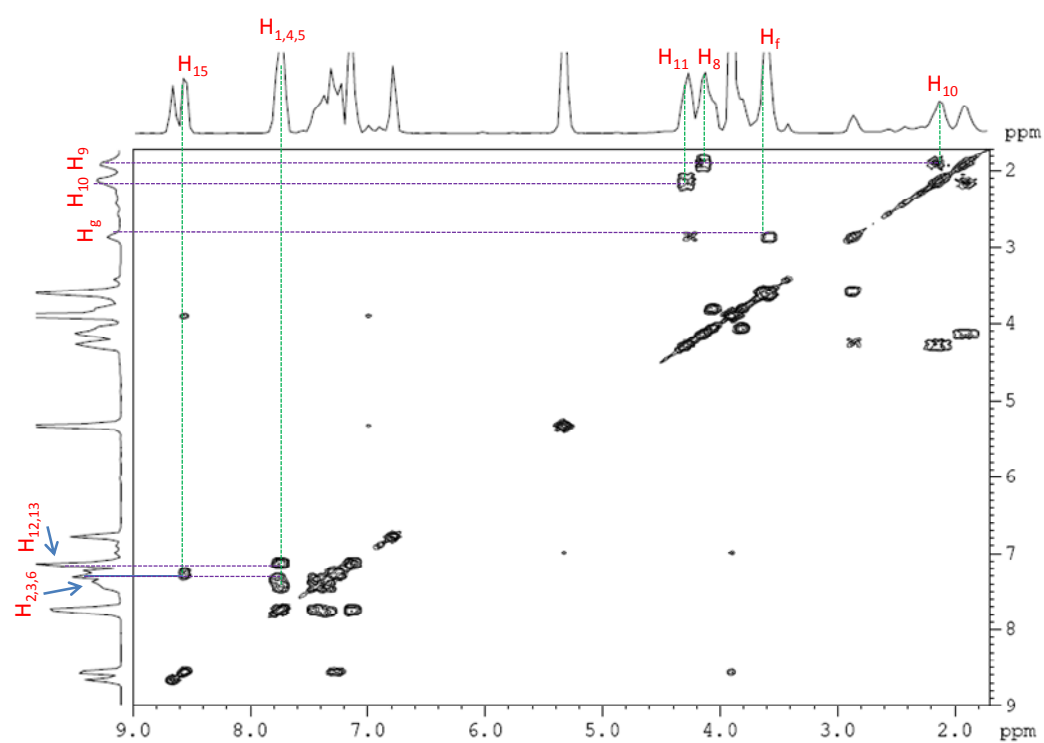

**ESI Figure 30:** 2D-COSY spectra OF **H.2G<sub>2</sub>** recorded in CD<sub>2</sub>Cl<sub>2</sub> at 25°C.

### 34. 2D-NOSEY spectrum of H.2G<sub>2</sub>

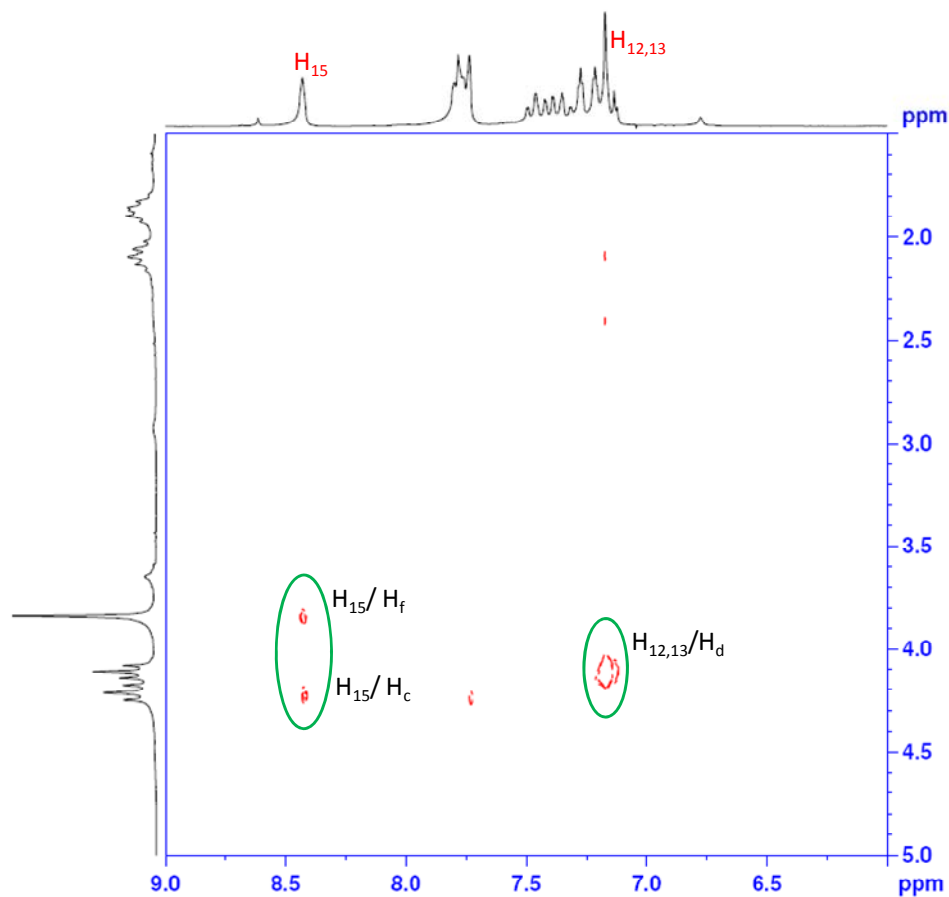

**ESI Figure 31:** 2D-NOSEY spectra OF **H.2G<sub>2</sub>** recorded in CD<sub>2</sub>Cl<sub>2</sub> at 25°C.

### 35. 2D-NOSEY spectrum of H.2G<sub>1</sub>

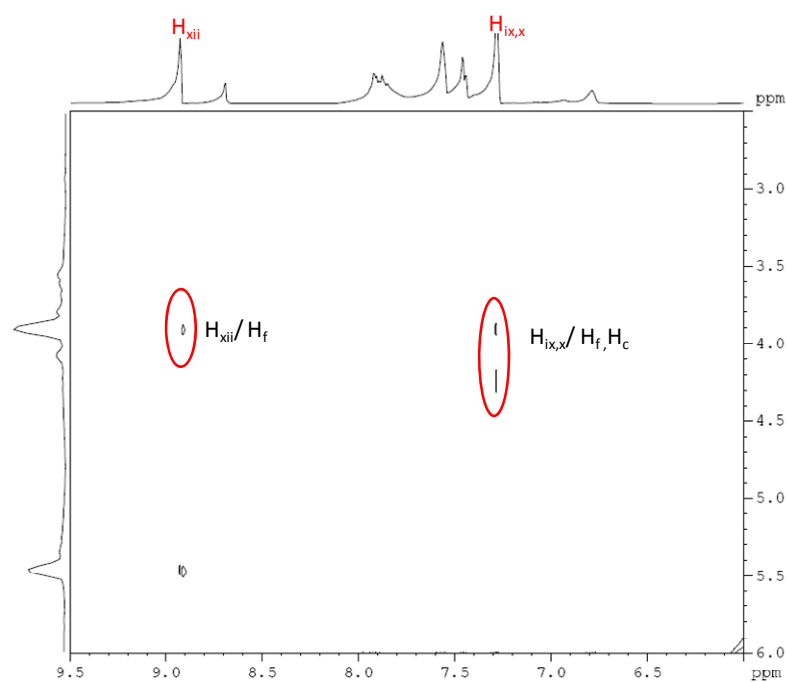

**ESI Figure 31:** 2D-NOSEY spectra OF **H.2G<sub>1</sub>** recorded in CD<sub>2</sub>Cl<sub>2</sub> at 25°C.
